# 1 **A Highly Immunogenic Measles Virus-based Th1-biased COVID-19 Vaccine**

2 Cindy Hörner<sup>1,2,†</sup>, Christoph Schürmann<sup>1,†</sup>, Arne Auste<sup>1,2</sup>, Aileen Ebenig<sup>1</sup>, Samada  
3 Muraleedharan<sup>1</sup>, Maïke Herrmann<sup>3</sup>, Barbara Schnierle<sup>4</sup>, and Michael D. Mühlebach<sup>1,2,\*</sup>

4 <sup>1</sup>Product Testing of IVMPs, <sup>3</sup>Pathogenesis of Respiratory Viruses, Div. of Veterinary Medicine,  
5 <sup>4</sup>Div. of Virology, Paul-Ehrlich-Institut, Paul-Ehrlich-Str. 51-59, D-63225 Langen, Germany

6 <sup>2</sup>German Center for Infection Research, Gießen-Marburg-Langen, Germany.

7 <sup>†</sup>These authors contributed equally

8 \*Correspondence should be addressed to Michael D. Mühlebach

9 **Email:** Michael.Muehlebach@pei.de

10

## 11 **Keywords**

12 SARS-CoV-2; COVID-19; measles vaccine platform; functional immunity; Th1 immune bias.

13

## 14 **Abstract**

15 The COVID-19 pandemic is caused by severe acute respiratory syndrome coronavirus-2 (SARS-  
16 CoV-2) and has spread world-wide with millions of cases and hundreds of thousands of deaths to  
17 date. The gravity of the situation mandates accelerated efforts to identify safe and effective  
18 vaccines. Here, we generated measles virus (MeV)-based vaccine candidates expressing the  
19 SARS-CoV-2 spike glycoprotein (S). Insertion of the full-length S protein gene in two different MeV  
20 genomic positions resulted in modulated S protein expression. The variant with lower S protein  
21 expression levels was genetically stable and induced high levels of effective Th1-biased antibody  
22 and T cell responses in mice after two immunizations. In addition to neutralizing IgG antibody  
23 responses in a protective range, multifunctional CD8<sup>+</sup> and CD4<sup>+</sup> T cell responses with S protein-  
24 specific killing activity were detected. These results are highly encouraging and support further  
25 development of MeV-based COVID-19 vaccines.

26

## 27 **Author Contributions**

28 CH performed research, analyzed data, and wrote the paper; CS performed research and analyzed  
29 data; AA performed research and analyzed data; AE performed research and analyzed data; SM  
30 performed research, analyzed data, and wrote the paper; MH developed the bioinformatics pipeline  
31 and analyzed data; BS contributed new reagents and concepts; MDM designed and supervised  
32 research, analyzed data and wrote the paper; all authors read, corrected and approved the final  
33 manuscript.

34

35

36 **Significance Statement**

37 The COVID-19 pandemic has caused hundreds of thousands of deaths, yet. Therefore, effective  
38 vaccine concepts are urgently needed. In search for such a concept, we have analysed a measles  
39 virus-based vaccine candidate targeting SARS-CoV-2. Using this well known, safe vaccine  
40 backbone, we demonstrate here induction of functional immune responses in both arms of adaptive  
41 immunity with the desired immune bias. Therefore, occurrence of immunopathologies such as  
42 antibody-dependent enhancement or enhanced respiratory disease is rather unlikely. Moreover,  
43 the candidate still induces immunity against the measles, recognized as a looming second menace,  
44 when countries are entrapped to stop routine vaccination campaigns in the face of COVID-19.  
45 Thus, a bivalent measles-based COVID-19 vaccine could be the solution for two significant public  
46 health threats.

## 47 **76 Introduction**

48  
49 Severe acute respiratory syndrome coronavirus-2 (SARS-CoV-2) belongs to *Coronaviridae* family  
50 and emerged towards the end of 2019 as causative agent of pneumonia in the Hubei province in  
51 China (1). The World Health Organisation named the disease Corona Virus Disease-2019 (COVID-  
52 19), and officially declared the pandemic state on March 11, 2020. Human coronaviruses have  
53 been known for decades as one of the causative agents of the common cold, but two previous  
54 coronavirus outbreaks, caused by the severe acute respiratory syndrome virus (SARS-CoV-1) and  
55 the Middle East respiratory syndrome virus (MERS-CoV), have demonstrated the remarkable  
56 pathogenic potential of human beta coronaviruses. Around 10,000 people have been infected by  
57 SARS and MERS, which has resulted in a death toll of about 1,500 patients, but the outbreaks  
58 remained largely confined in terms of time or spread, respectively. In contrast, SARS-CoV-2  
59 spreads effectively and at a rapid pace by direct transmission with an  $R_0$  of at least 2 to 2.5 (2, 3).  
60 Due to high transmissibility and extensive community spread, this novel coronavirus has already  
61 caused over 12.1 million infections and over 550,000 deaths (as of 10 July 2020;  
62 <https://www.who.int/emergencies/diseases/novel-coronavirus-2019>), while world-wide shut-downs  
63 of social life and economy to confine the spread of this respiratory virus are causing have  
64 considerable impact.

65 After the emergence of SARS in 2002 and then MERS in 2012, vaccine development efforts have  
66 been initiated, including the use of recombinant measles virus (MeV) vaccine as a platform concept  
67 (4) to develop vector vaccine candidates against both agents and showed promising results.  
68 Recombinant MeV vectors encoding the unmodified SARS-CoV Spike protein induced high titers  
69 of neutralizing antibodies as well as IFN- $\gamma$  T cell responses (5, 6) and conferred protection to  
70 immunized animals upon pathogen challenge by lowering virus titers more than 100-fold (5). For  
71 MERS, we have demonstrated that both, high titers of neutralizing antibodies as well as effective  
72 and polyfunctional T cell responses, were induced in vaccinated animals (7, 8) and conferred  
73 protection (7). Based on these data, a MeV-based MERS-vaccine candidate has been selected by  
74 the Coalition for Epidemic Preparedness Initiative (CEPI) for further clinical development  
75 ([www.cepi.net/research\\_dev/our-portfolio](http://www.cepi.net/research_dev/our-portfolio)).

76 Here, we explored the potential of recombinant MeV as vectors for the expression of the SARS-  
77 CoV-2 spike protein (S) as successfully applied for the development of MERS- (7, 8) and SARS-  
78 vaccine candidates (5, 6) as well as numerous other pathogens (4). The S glycoprotein was chosen  
79 as antigen for its role as primary target of neutralizing antibodies (6, 7) and the exemplary capability  
80 of MERS-CoV S protein to trigger strong cell-mediated immune responses when expressed by MeV  
81 in our front-runner MERS vaccine candidate (7, 8). The SARS-CoV-2 S protein-encoding gene was  
82 inserted into two different positions of the MeV genome to modulate antigen expression, and both

83 recombinant MeV were successfully rescued. The virus expressing lower S protein levels resulted  
84 in stable amplification over at least 10 passages, while impairment of replication was insignificant.  
85 Indeed, immunization of IFNAR<sup>-/-</sup>-CD46Ge mice induced strong and functional humoral and cellular  
86 immune responses directed against both MeV and SARS-CoV-2 S protein biased for Th1-type T  
87 cell and antibody responses, illustrating the potential of MeV platform-based COVID-19 vaccine  
88 candidates.

89

90

## 91 **Results**

92

### 93 **Generation and characterization of SARS-CoV-2-S by recombinant MeV<sub>vac2</sub>**

94 Since the SARS-CoV and MERS-CoV spike proteins (S) have been shown to potently induce  
95 humoral and cellular immune responses, the SARS-CoV-2 S protein was chosen as appropriate  
96 antigen to be expressed by the recombinant MeV vaccine platform. A codon-optimized full-length  
97 gene encoding SARS-CoV-2 S protein was cloned into two different additional transcription units  
98 (ATUs) in the vaccine strain MeV<sub>vac2</sub> genome, either downstream of the P (post P) or H (post H)  
99 gene cassettes (Fig. 1A). Recombinant viruses were successfully generated and amplified up to  
100 P10 in Vero cells with titers of up to 4×10<sup>7</sup> TCID<sub>50</sub>/ml. The stability of the viral genomes was  
101 demonstrated via sequencing after RT-PCR of viruses in P2 or P10. In parallel to Sanger  
102 sequencing of the ATU-region encompassing the SARS-CoV-2-S gene, the full genome was  
103 sequenced using next generation sequencing with a coverage of 4 to 29,683 reads of each position  
104 (Suppl. Fig. S1) in P2. Both methods revealed no mutations across the whole vaccine genomes  
105 but a single A to G substitution on position 9 of the non-coding trailer region of the MeV<sub>vac2</sub>-SARS2-  
106 S(H) clone used for *in vivo* studies.

107 To verify SARS-CoV-2 S protein expression levels, Western blot analysis of Vero cells infected with  
108 the MeV<sub>vac2</sub>-SARS2-S was performed. The S protein expression was slightly attenuated when cells  
109 were infected with viruses encoding the antigen in the ATU post-H compared to the post-P  
110 constructs (Fig. 1B). However, there was less overall viral protein expression in cells infected with  
111 post-P construct. Comparative growth kinetics with the vaccine viruses containing the SARS-CoV-  
112 2 S gene and the MV<sub>vac2</sub>-ATU(P) control virus revealed that the MeV<sub>vac2</sub> encoding full-length SARS-  
113 CoV-2 S gene in post-P position grew remarkably different to the control virus, with approximately  
114 100-fold reduced maximal titers. In contrast, growth of MeV<sub>vac2</sub>-SARS2-S(H) was much closer to  
115 MV<sub>vac2</sub>-ATU(P) with only a slight trend for lower titers (Fig. 1 C and D).

116 The impaired growth of MeV<sub>vac2</sub>-SARS2-S(P) was accompanied by a hyper-fusogenic phenotype  
117 (Fig. 1E, Suppl.Fig. S2A), which was also observed for the post-H vaccine candidate, but to a lesser  
118 extent. Therefore, fusion activity was quantified and compared to the parental MV<sub>vac2</sub>-ATU(P) as  
119 well as the MV<sub>NSe</sub>-GFP(N), which is known for its hyperfusogenic phenotype due to a V94M

120 substitution in the F<sub>2</sub> subunit of the MeV fusion protein (9). MV<sub>vac2</sub>-ATU(P) induced fusion of  
121 16.8±0.8 (mean±SD) Vero cells 30 h after infection. MeV<sub>vac2</sub>-SARS2-S(P) revealed approximately  
122 4-fold enhanced fusion activity (syncytia including 70±8 cells) while MeV<sub>vac2</sub>-SARS2-S(H) just fused  
123 41±6 cells, thereby representing an intermediate phenotype. However, fusion activity of the latter  
124 became surpassed by MV<sub>NSe</sub>-GFP(N) that fused 56±4 cells in 30 h under the same conditions  
125 (Suppl. Fig. S2B).

126 To investigate if this increased fusion activity is due to SARS-CoV-2 S protein-mediated cell-to-cell  
127 fusion, we expressed the SARS-CoV-2 S protein by transfection of the eukaryotic expression  
128 plasmid pcDNA3.1-SARS2-S into SARS-CoV-2 receptor hACE2-negative 293T as well as into  
129 receptor-positive Vero cells. Indeed, expression of SARS-CoV-2 S protein induced syncytia of  
130 Vero, but not of 293T cells (Suppl. Fig. S3).

131 These data demonstrate that the hyperfusogenic phenotype of the SARS-CoV-2 S-encoding MeV  
132 is linked to expression of a fusion-active form of the SARS-CoV-2 S protein, indicating that cells  
133 infected by the vaccine candidates express a functional S protein. Thus, cloning and rescue of  
134 MeVs expressing correctly folded SARS-CoV-2 S was achieved successfully. Since higher S  
135 protein expression levels impaired viral replication, MeV<sub>vac2</sub>-SARS2-S(H) was chosen for further  
136 characterization *in vivo*.

137

### 138 **MeV<sub>vac2</sub>-SARS2-S(H) induces neutralizing antibodies against MeV and SARS-CoV-2**

139 To test the efficacy of MeV<sub>vac2</sub>-SARS2-S(H) *in vivo*, genetically modified IFNAR<sup>-/-</sup>-CD46Ge mice  
140 were used, since they are the prime small animal model for analysis of MeV-derived vaccines (10).  
141 Groups of 4 - 6 animals were immunized via the intraperitoneal (i.p.) route on days 0 and 28 with  
142 1×10<sup>5</sup> TCID<sub>50</sub> of MeV<sub>vac2</sub>-SARS2-S(H) or empty MV<sub>vac2</sub>-ATU(P) as a control. As positive control,  
143 recombinant SARS-CoV-2 S protein adjuvanted with aluminum hydroxide gel (Alum) was injected  
144 subcutaneously, and medium-inoculated mice served as mock controls. 21 days after the second  
145 immunization, sera of immunized mice were analyzed in comparison to pre-bleed and post-prime  
146 immunization sera by ELISA on antigen-coated plates for total IgG antibodies binding to MeV bulk  
147 antigens (Fig. 2G-I) or SARS-CoV-2-S protein (Fig. 2A-C). Sera of mice vaccinated with MeV<sub>vac2</sub>-  
148 SARS2-S(H) contained IgG antibodies that bound to SARS-CoV-2-S protein (Fig. 2B and C),  
149 whereas no antibodies were found in mice before vaccination (Fig. 2A), or in MeV or mock-  
150 immunized control mice. Moreover, final sera of mice vaccinated with any recombinant MeV had  
151 IgG in the serum binding to MeV bulk antigens, indicating at least one successful vaccination with  
152 MeVs and general vector immunogenicity (Fig. 2G-I). The control S protein vaccine did induce  
153 higher levels of S protein-binding IgG than MeV<sub>vac2</sub>-SARS2-S(H).

154 We next determined the neutralizing antibody responses against SARS-CoV-2 (Fig. 2D-F) or MeV  
155 (Fig. 2J-L). Most mice immunized with recombinant MeV, including those receiving the control virus,

156 had developed MeV neutralizing antibody titers (VNT) after the first immunization (Fig. 2K).  
157 However, one mouse of the MeV<sub>vac2</sub>-SARS2-S(H) cohort initially reacted only weakly and another  
158 mouse not at all, reflecting individual differences in response to immunization. All animals had  
159 developed neutralizing antibodies after the second immunization, and a 3-fold increase was  
160 observed upon the second immunization (257 to 800 VNT, Fig. 2K, L). Neutralizing antibodies  
161 against SARS-CoV-2 were detected in mice vaccinated with MeV<sub>vac2</sub>-SARS2-S(H) after the second  
162 immunization, and reached a titer of 15 to 80 in three out of 6 mice (Fig. 2F). These titers were in  
163 the range of human convalescent sera tested in parallel (VNT 10 to 60; Fig. 2M). No VNTs against  
164 MeV or SARS-CoV-2 were detected in control mice inoculated with medium alone. Interestingly,  
165 the alum-adjuvanted recombinant S protein did not induce any neutralizing antibodies despite  
166 higher binding IgG levels in ELISA, indicating that these antibodies bind to other epitopes of S or  
167 with lower affinity than those induced by the MeV-based vaccine candidate. In summary, the SARS-  
168 CoV-2-S protein-expressing MeV elicited robust neutralizing antibody responses against MeV and  
169 SARS-CoV-2.

170

#### 171 **Splenocytes of animals vaccinated with MeV<sub>vac2</sub>-SARS2-S(H) react to SARS-CoV-2 S protein-** 172 **specific stimulation**

173 To assess the ability of MeV<sub>vac2</sub>-SARS2-S(H) to induce SARS-CoV-2-specific cellular immune  
174 responses, splenocytes of vaccinated animals were analyzed for antigen-specific IFN- $\gamma$  secretion  
175 by ELISpot assay. Towards this, antigen-specific T cells were re-stimulated by co-cultivation with  
176 the syngeneic murine DC cell lines JAWSII or DC2.4 stably expressing the SARS-CoV-2 S protein.  
177 For JAWSII cells, bulk cultures of transduced cells were obtained by flow cytometric sorting. For  
178 DC2.4 cells, single cell clones were generated by limiting dilution of sorted respective of bulks  
179 cultures. Antigen expression by transduced DCs was verified by Western Blot analysis (data not  
180 shown).

181 ELISpot assays using splenocytes of vaccinated animals in co-culture with DC2.4-SARS2-S cells  
182 revealed more than 1,400 IFN- $\gamma$  secreting cells per  $1 \times 10^6$  splenocytes after immunization with  
183 MeV<sub>vac2</sub>-SARS2-S(H), respectively (Fig. 3). In contrast, co-culture with splenocytes of control mice  
184 resulted in a background response of less than 50 IFN- $\gamma$  producing cells per  $1 \times 10^6$  splenocytes. As  
185 expected, re-stimulation of T cells by DC2.4 presenting no exogenous antigen revealed only  
186 reactivity in the range of background (Fig. 3). To rule out clonal or cell line-associated artifacts,  
187 antigen-specific IFN- $\gamma$  secretion by splenocytes of MeV<sub>vac2</sub>-SARS2-S(H) vaccinated mice was  
188 confirmed by stimulation with transgenic JAWSII-SARS2-S bulk cells. These cells also stimulated  
189 in excess of 1,400 IFN- $\gamma$  secreting cells per  $1 \times 10^6$  splenocytes in animals receiving the recombinant  
190 SARS-CoV-2 vaccines, whereas only slight background stimulation was observed by the  
191 respective controls. The differences between MeV control and MeV<sub>vac2</sub>-SARS2-S vaccinated mice

192 were statistically significant for both cell lines. Mice vaccinated with Alum-adjuvanted S protein  
193 showed no specific reactivity in IFN- $\gamma$  ELISpot.

194 Cellular immune responses upon stimulation with MeV bulk antigens were detected in animals that  
195 had been vaccinated with any recombinant MeV virus, as expected. While MeV bulk antigens  
196 stimulated only about 300 to 700 IFN- $\gamma$  secreting cells per  $1 \times 10^6$  splenocytes of MV<sub>vac2</sub>-ATU(P)  
197 vaccinated animals, but 400 to 1,400 IFN- $\gamma$  secreting cells per  $1 \times 10^6$  splenocytes of MeV<sub>vac2</sub>-  
198 SARS2-S(H) vaccinated animals. However, this trend was not statistically significant. Splenocytes  
199 of all animals revealed a similar basic reactivity to unspecific T cell stimulation, as confirmed by  
200 numbers of IFN- $\gamma$  secreting cells upon ConA treatment at the limit of detection. Remarkably,  
201 stimulation of splenocytes by DC2.4 expressing SARS-CoV-2-S resulted in at least similar or even  
202 higher numbers of IFN- $\gamma^+$  cells than after stimulation by MeV bulk antigens, indicating an extremely  
203 robust induction of cellular immunity against this antigen. Taken together, these data show that  
204 MeV<sub>vac2</sub>-SARS2-S(H) not only induces humoral, but also strong SARS-CoV-2-S protein-specific  
205 cellular immune responses.

206

#### 207 **SARS-CoV-2 S-reactive T cells are multifunctional**

208 To gain more detailed insights in the quality of the observed T cell responses, we further  
209 characterized the responsive T cell populations by flow cytometry, determining the expression of  
210 IFN- $\gamma$ , TNF- $\alpha$  and IL-2 in CD8 $^+$  and CD4 $^+$  positive CD3 $^+$  T cells upon re-stimulation with SARS-  
211 CoV-2 S-presenting DC2.4-SARS2-S cells by intracellular cytokine staining (ICS). As a positive  
212 stimulus for T cell activation, tetradecanoylphorbol-acetate and ionomycin (TPA/Iono) were used.  
213 Exocytosis of cytokines was blocked by addition of brefeldin A (10  $\mu$ g/mL) during stimulation. Cells  
214 were permeabilized, labelled, and fixed for flow cytometry. The gating strategy excluded duplicates  
215 (Suppl. Fig. S4, top row, middle panel), selected for living cells (Suppl. Fig. S4, top row, right panel),  
216 and separated CD8 $^+$  and CD4 $^+$  T cells on CD3 $^+$  cell populations (Suppl. Fig. S4, 2<sup>nd</sup> row). Selected  
217 T cells were then analyzed for their expression of IFN- $\gamma$ , TNF- $\alpha$ , or IL-2, double- (Suppl. Fig. S4,  
218 3rd row), or triple-positive cells (Suppl. Fig. S4, bottom row) as exemplarily shown for CD4 $^+$  T cells  
219 after re-stimulation with TPA and ionomycin (Suppl. Fig. S4).

220 Vaccination with MeV<sub>vac2</sub>-SARS2-S(H) induced a significant amount of SARS-CoV-2 S-specific  
221 CD8 $^+$  T cells expressing either IFN- $\gamma$  (Fig. 4B, left panel), IL-2 (Fig. 4B, middle panel) or TNF- $\alpha$   
222 (Fig. 4B, right panel), with means between 0.1% and 0.5% of positive cells for each of these  
223 cytokines. Among those, a significant fraction of cells proved to be multifunctional, with a mean of  
224 49% of the reactive CD8 $^+$  cells expressing two cytokines or 13% of responsive CD8 $^+$  cells being  
225 positive for TNF- $\alpha$ , IL-2 and IFN- $\gamma$  (Fig. 4C). A much lower portion of responsive CD4 $^+$  T cells was  
226 observed, varying between 0.01% to 0.07% of CD4 $^+$  T cells. Among the responsive CD4 $^+$  cells,

227 46% expressed two cytokines and 10% were positive TNF- $\alpha$ , IL-2 and IFN- $\gamma$ . Moreover,  
228 vaccination induced a significant fraction of vector-specific CD4<sup>+</sup> T cells expressing IFN- $\gamma$  (Fig. 4A,  
229 left panel), IL-2 (Fig. 4A, middle panel) or TNF- $\alpha$  (Fig. 4A, right panel) upon re-stimulation with MeV  
230 bulk antigen. Among those, multifunctional CD4<sup>+</sup> T cells expressing two or all three cytokines were  
231 induced with a mean of about 22% and 6% poly-reactive T cells (Fig. 4C), respectively. To  
232 conclude, vaccination with MeV<sub>vac2</sub>-SARS2-S(H) induces not only IFN- $\gamma$ , TNF- $\alpha$ , or IL-2 expressing  
233 T cells directed against SARS-CoV-2 and MeV, but also a significant fraction of multifunctional  
234 cytotoxic T cells specific for SARS-CoV-2 S and CD4<sup>+</sup> T cells specific for MeV antigens, illustrating  
235 that a broad and robust SARS-CoV-2-specific immune response is induced by vaccination with  
236 MeV<sub>vac2</sub>-SARS2-S(H).

237

238 **MeV<sub>vac2</sub>-SARS2-S(H) induced antigen-specific CD8<sup>+</sup> and CD4<sup>+</sup> T cells respond with**  
239 **proliferation.**

240 While ELISpot and ICS analyses revealed antigen-specific cytokine secretion by vaccinated mice'  
241 T cells, we next aimed at detecting antigen-specific CD8<sup>+</sup> cytotoxic T lymphocytes (CTLs) which  
242 would be important for clearance of virus infected cell and CD4<sup>+</sup> T helper cells. For that purpose,  
243 proliferation of CD8<sup>+</sup> and CD4<sup>+</sup> T cells upon stimulation with SARS-CoV-2-S was analyzed 3 weeks  
244 after the boost via a flow cytometry. Splenocytes of mice were isolated 21 days after the boost, and  
245 DC2.4-SARS2-S cells were used for re-stimulation of T cells. The splenocytes were labelled with  
246 CFSE and subsequently co-cultured with DC2.4-SARS2-S cells or, as a control, with parental  
247 DC2.4 cells for 6 days and finally stained for CD3, CD4, and CD8 before being analyzed for  
248 proliferation, detectable by the dilution of the CFSE stain due to cell division.

249 T cells of mice vaccinated with MeV<sub>vac2</sub>-SARS2-S(H) revealed an increase in the population of  
250 CD3<sup>+</sup>CD4<sup>+</sup>CFSE<sup>low</sup> and CD3<sup>+</sup>CD8<sup>+</sup>CFSE<sup>low</sup> cells after re-stimulation with DC2.4-SARS2-S cells  
251 compared to re-stimulation with parental DC2.4 without SARS-CoV-2 S antigen (Fig. 5). In contrast,  
252 T cells of control mice did not reveal this pattern, but the CFSE<sup>low</sup> population remained rather  
253 constant. The prominent increase in CD3<sup>+</sup>CD8<sup>+</sup>CFSE<sup>low</sup> cells, which was significant for MeV<sub>vac2</sub>-  
254 SARS2-S(H) vaccinated mice, indicates that CD3<sup>+</sup>CD8<sup>+</sup> CTLs and CD3<sup>+</sup>CD4<sup>+</sup> T helper  
255 lymphocytes specific for SARS-CoV-2 S have proliferated upon stimulation. Thus, SARS-CoV-2-  
256 specific cytotoxic memory T cells are induced in mice after vaccination with MeV<sub>vac2</sub>-SARS2-S(H).

257

258 **Induced T cells reveal antigen-specific cytotoxicity.**

259 To demonstrate the effector ability of induced cytotoxic T lymphocytes (CTLs), a killing assay was  
260 performed to directly analyze antigen-specific cytotoxicity (Fig. 6). Splenocytes of immunized mice  
261 isolated 21 days post boost vaccination were co-cultured with DC2.4-SARS2-S or parental DC2.4  
262 cells for 6 days to re-stimulate antigen-specific T cells. When these re-stimulated T cells were co-



263 incubated with a defined mixture of EL-4<sub>green</sub>-SARS2-S target and EL-4<sub>red</sub> control cells (ratio  
264 approximately 1:1), only T cells from MeV<sub>vac2</sub>-SARS2-S(H) vaccinated mice significantly shifted the  
265 ratio of live SARS-CoV-2 S protein-expressing target cells to control cells in a dose-dependent  
266 manner (Fig. 6B). This antigen-dependent killing was also dependent on re-stimulation with DC2.4-  
267 SARS2-S cells, since unstimulated T cells did not significantly shift the ratios of target to non-target  
268 cells (Fig. 6A).

269 These results indicate that CTLs isolated from MeV<sub>vac2</sub>-SARS2-S(H)-vaccinated mice are capable  
270 of lysing cells expressing SARS-CoV-2 S. Neither splenocytes of control mice re-stimulated with  
271 DC2.4-SARS2-S nor splenocytes of SARS-CoV-2-S vaccinated mice re-stimulated with control  
272 DC2.4 cells showed such an antigen-specific killing activity, demonstrating that MeV<sub>vac2</sub>-SARS2-  
273 S(H) induces fully functional antigen-specific CD8<sup>+</sup> CTLs.

#### 274 **Induced immunity is skewed towards Th1-biased responses.**

275 While the functionality of both humoral and cellular anti-SARS-CoV-2 immune responses elicited  
276 by MeV<sub>vac2</sub>-SARS2-S(H) is reassuring, the SARS-CoV-2 vaccine development has to proceed with  
277 some caution because of the potential risk of immunopathogenesis observed in some animal  
278 models, such as antibody-dependent enhancement (ADE) and enhanced respiratory disease  
279 (ERD) which seem to correlate with a Th2-biased immune response. Since in mice IgG1 is a marker  
280 for Th2-bias and risk of ADE development, whereas IgG2a antibodies indicate a favorable Th1-  
281 bias, IgG subtype-specific ELISA were performed with the sera collected at different time points.  
282 Animals vaccinated with alum-adsorbed SARS-CoV-2 S protein, a vaccine concept known for its  
283 Th2-bias (11, 12), developed high levels of S protein-specific IgG1 antibodies, whereas few S-  
284 specific IgG2a antibodies were detected (Fig. 7A). In comparison, MeV<sub>vac2</sub>-SARS2-S(H) induced  
285 100-fold less IgG1 antibodies, but at least 10-fold higher IgG2a levels (Fig. 7A), indicating a  
286 favorable Th1-bias in animals immunized with the MeV-derived vaccine candidate.

287 These findings were confirmed by multiplex cytokine analysis of the cytokine profile in the  
288 supernatants of splenocytes from vaccinated animals, which were re-stimulated using DC2.4 or  
289 DC2.4-SARS2-S cells. All splenocytes revealed secretion of all cytokines after stimulation with  
290 ConA demonstrating general reactivity of cells and assay (data not shown). Most likely due to the  
291 low number of S-reactive T cells in animals that had been vaccinated with recombinant SARS2-S  
292 protein and Alum, no or minimal, constant cytokine levels were measurable in the supernatants of  
293 re-stimulated splenocytes (Fig. 7B). In contrast, splenocytes of animals immunized with MeV<sub>vac2</sub>-  
294 SARS2-S(H) reacted specifically with the secretion of IFN- $\gamma$ , TNF- $\alpha$ , and IL-2 upon re-stimulation  
295 by DC2.4-SARS2-S (Fig. 7B, top row), in accordance with ELISpot and ICS data. However, we  
296 could observe no or minimal up-regulation of IL-4, IL-5, IL-13, or IL-10, which would have been

297 indicative for a Th2-biased response (Fig. 7B, middle row). Also IL-17a, or IL-6 indicative of a Th17  
298 or general inflammatory response showed minimal changes (Fig. 7 B, bottom row).

299 Thus, both humoral and cellular responses reveal a Th1-biased immunity induced by MeV<sub>vac2</sub>-  
300 SARS2-S(H), which indicates a relatively low risk for putatively Th2-mediated immunopathologies.

301  
302

### 303 **Discussion**

304  
305 In this study, we aimed to analyze the efficacy of MeV-derived vaccine candidates encoding the  
306 Spike glycoprotein S of SARS-CoV-2 to induce functional immune responses to protect against  
307 COVID-19. We show that MeV<sub>vac2</sub>-SARS2-S(H) replicated comparably to MeV vaccine strain  
308 viruses and was genetically stable over extended passaging. Upon vaccination of mice, it induced  
309 robust humoral immune responses of the IgG2a subtype directed against the SARS-CoV-2 spike  
310 glycoprotein S with neutralizing activity in a range already shown to be protective by others. In  
311 addition, considerable amounts of SARS-CoV-2 S-specific CD4<sup>+</sup> and CD8<sup>+</sup> T cells were induced,  
312 the major fraction of which were secreting two or even all three cytokines when analysing for IFN- $\gamma$ ,  
313 TNF- $\alpha$ , or IL-2 upon antigen-specific re-stimulation. These T cells proliferated and specifically  
314 depleted antigen-positive target cells in a mixed population. Importantly, all responses were skewed  
315 toward Th1-biased immunity. In parallel, the capacity to induce measles-specific immune reactivity  
316 remained conserved.

317 This effective MeV Moraten strain-derived recombinant vaccine MeV<sub>vac2</sub>-SARS2-S(H) is a live-  
318 attenuated vaccine that encodes the full-length, functional version of the SARS-CoV-2 Spike  
319 protein as main target for functional antibodies, but also for induction of T cell responses. Vero cells  
320 revealed homogenous expression of the SARS-CoV-2 S antigen by Western Blot analyses and  
321 positive immunostaining of syncytia after infection by MeV<sub>vac2</sub>-SARS2-S(H). Stable antigen  
322 expression is a prerequisite for the immune system to encounter the specific antigen to mount  
323 robust immune responses and for industrial production of a vaccine. Indeed, IFNAR<sup>-/-</sup>-CD46Ge  
324 mice vaccinated with MeV<sub>vac2</sub>-SARS2-S(H) in a prime-boost protocol showed uniform induction of  
325 antibodies directed against MeV bulk antigens or SARS-CoV-2 S, which had considerable  
326 neutralizing activity against both pathogens. We observe antibody responses in these animals at a  
327 level that correlate with protection in mouse challenge models (13), as well as with neutralizing  
328 activity we found in the serum of 4 reconvalescent human patients. These responses were triggered  
329 even though the knock-out of the type I interferon receptor, which is necessary to allow propagation  
330 of MeV in mice (10, 14). This knock-out usually should impair the induction of especially humoral  
331 immune responses (15). This highlights the remarkable immunogenicity of the MeV vaccine  
332 platform technology that also works in this model with partially impaired immune responses.

333 However, why did not all immunized animals develop neutralizing activity detectable in our assay?  
334 Firstly, determination of the VNT relying on 100% pathogen neutralization is obviously a rather  
335 harsh assay in the context of SARS-CoV-2, as evidenced by the modest VNT titers published so  
336 far, in general, and absence of VNT in the S+Alum vaccinated group despite high amounts of S  
337 binding antibodies. This means that just detectable VNT already indicates considerable neutralizing  
338 activity. Secondly, we realized that two of the three animals which did not show a VNT >10 have  
339 not responded well to the prime vaccination, at all. These animals developed none or only a minor  
340 VNT against MeV after the first vaccination. This observation is rather unusual, and argues for  
341 technical issues during the first vaccination in these two animals. Since none of the animals showed  
342 VNT against SARS-CoV-2 after one vaccination with the vaccine, it is tempting to speculate that a  
343 prime-boost-protocol is associated in this animal model with maturation of antibodies to generate  
344 better neutralizing responses. On the other hand, all animals including the two improperly  
345 immunized ones revealed significant, multi-functional T cell responses against SARS-CoV-2 S,  
346 which were still recordable three weeks after the second vaccination, when we already expect  
347 constriction of antigen-specific T cell effector populations. These data suggest that anti-S antibody  
348 responses mature after repeated vaccination, but on the other hand that a one shot vaccination  
349 regime will already induce especially functional memory T cell immune responses, the protective  
350 efficacy of which as well as their duration has to be demonstrated in future challenge experiments.  
351 In any case, we have observed with other foreign viral antigens that these T cell responses can be  
352 detected in mice more than 2 years after vaccination (Hörner & Fiedler et al., unpublished data).  
353 This observation is in accordance with the stability of anti-measles immunity (16) also after pediatric  
354 vaccination (17) and might be a specific advantage of the measles vaccine platform technology.  
355 Also extended passaging of the vaccine candidate did not result in changes of the vaccine as  
356 revealed by sequencing of the virus after 10 passages starting with a low MOI. This genetic stability  
357 indicates that the slight impairment seen in multi-step growth curves when compared to a vaccine-  
358 strain MeV is not critical for the vaccine's amplification and therefore crucial for product safety. In  
359 accordance with its genetic stability, the minor enhancement of fusion activity can also be regarded  
360 as non-critical, especially with a view on the fusion activity of MeV used in clinical trials for treatment  
361 of tumors. These so called oncolytic MeV have been used in 15 phase 1 and phase 2 clinical trials,  
362 so far. Thereby, advanced-stage tumor patients suffering from different tumor entities have been  
363 treated. Despite constituting in principle a vulnerable patient collective, application of high doses of  
364 non-targeted, fusion-active MeV (up to  $1 \times 10^{11}$  TCID<sub>50</sub>) (18) systemically or for example directly into  
365 the patients' brains (19) was accompanied by an acceptable safety profile (20). Therefore, the  
366 enhancement of fusion activity cannot be expected to be crucial for product safety, while the  
367 attenuation of vaccine-strain MeV is multifactorial, anyway, and not just a matter of cell entry  
368 tropism and mechanism (21). Likewise, the clinical phase 1 and 2 trials using the MeV vector

369 platform for the generation of bivalent vaccines, which induce immunity against CHIKV (22, 23),  
370 have revealed an extremely beneficial safety profile of this recombinant vaccine concept also in  
371 human patients, while signs of efficacy became evident.

372 In any case, generation of MeV-derived COVID-19 vaccines encoding a less fusion-active variant  
373 of the SARS-CoV-2 Spike glycoprotein might be beneficial to enhance titers of the vaccine virus.  
374 In the meantime, stabilized S variants have become available that have attenuated or no cell-cell  
375 fusion activity. One variant has a deletion of the multi-basic cleavage motif for furin-like proteases  
376 at the S1/S2 boundary that facilitates pre-activation of S (24). A second variant has proline  
377 substitutions at residues 986 and 987, which are stabilizing a pre-fusion conformation of S (25).  
378 Vaccine candidates encoding S with one of these motifs or a combination thereof in a soluble  
379 version as already done for DNA vaccines (26) are under development. These have to show an at  
380 least comparable capacity to induce neutralizing antibody responses also in the context of MeV  
381 infection, which might be dependent on the respective conformation of the antigen that is expressed  
382 by vaccine virus-infected cells *in situ*.

383 The induction of the “right” antibodies and T cell responses is especially crucial with a view on  
384 potential complications that can be observed when coronavirus encounter “wrong” immune  
385 responses that can give rise to immunopathologies after infection. In some infected cats, infection  
386 with feline coronavirus causes feline infectious peritonitis, a deadly disease characterized by viral  
387 infection of macrophages during the acute phase. Interestingly, the switch of pathology after  
388 infection from a rather moderate pathogenesis into an acute, devastating disease can be triggered  
389 by vaccination of persistently infected cats and has been attributed to the induction of antibodies  
390 that mediate enhancement of the disease, a process called antibody-dependent enhancement  
391 (ADE). During COVID-19, ADE might be the cause of the severe cases currently observed. Some  
392 case reports indicate that severe disease appeared more frequently in patients with high SARS-  
393 CoV-2 immunoglobulin G (IgG) levels (27). ADE has been most prominent for dengue virus (DENV)  
394 infections, especially in secondary infections with a different DENV serotype where enhancement  
395 of disease correlated with the induction of non-neutralizing Abs that can mediate an efficient uptake  
396 of the virus in FcR-positive cells such as macrophages and other immune cells (28). Moreover,  
397 other immune-related adverse events were described for SARS- and MERS-CoV. When animals  
398 were immunized with vaccines that pre-dominantly induce Th2-biased T-helper cell responses,  
399 vaccinated mice revealed significantly reduced virus loads after challenge, but also an eosinophilic  
400 infiltrate into the lungs accompanied by pathological changes of the lung tissue, so called enhanced  
401 respiratory disease (ERD) (29). Such immunopathologies upon CoV infection are a major concern  
402 for diseases pathology and especially vaccine development. Thus, Th2-biased immune responses  
403 as triggered by alum-adjuvanted whole inactivated virus particles or recombinant proteins should  
404 be avoided.

405 Interestingly, the live-attenuated MeV vaccine is known for a balanced Th1/Th2-bias of induced  
406 immune responses with a bias for Th1 responses at least during the acute phase after vaccination  
407 (30). In theory, this should also apply for immune responses induced against all antigens presented  
408 during a MeV vaccine virus infection including foreign antigen(s) additionally expressed when MeV  
409 is used as vaccine platform. Indeed, our analyses provide evidence that the bias of the immune  
410 responses is in favour of Th1 responses, as revealed by the inverted IgG1/IgG2a subtype ratio of  
411 antibodies induced against SARS-CoV-2 S by MeV<sub>vac2</sub>-SARS2-S(H) compared to the animals  
412 immunized with alum-adjuvanted recombinant S protein. Moreover, the cytokine profile of  
413 splenocyte cultures of immunized mice after re-stimulation of S-specific T cells reveals a respective  
414 preferable Th1 bias. Since SARS-CoV-2 and SARS-CoV use the same primary attachment  
415 receptor for cell entry, hACE2, and selected hACE2-transgenic mice show differential pathology  
416 after inoculation with SARS-CoV-2 (13, 31), studying the impact of the Th1-biased MeV-based  
417 immunization in hACE2-transgenic mice during challenge with SARS-CoV-2 will be a matter of  
418 future studies. In any case, our data suggest that MeV-derived COVID-19 vaccines have a low  
419 likelihood to trigger immunopathogenesis. Another animal model for COVID-19, golden Syrian  
420 hamsters, could be an alternative for future challenge studies. This animal model is susceptible for  
421 SARS-CoV-2 infection, reveals a moderate, but clearly distinguishable pathology, and shows air-  
422 borne transmissibility from infected to naïve animals (32, 33). Therefore, this animal model  
423 accurately reflects at least some aspects of the course of human disease and should be valuable  
424 for assessment of the protective efficacy of COVID-19 vaccines.

425 In conclusion, the bivalent MeV/SARS-CoV-2 vaccine candidate has a number of desirable  
426 properties with respect to its immunogenicity against SARS-CoV-2. Furthermore, the concurrent  
427 induction of anti-MeV immunity would allow its use in the context of routine measles immunization  
428 schedules. Such a MeV-based COVID-19 vaccine could be included in the currently applied MMR  
429 (measles, mumps, rubella) vaccine, providing additional protection against SARS-CoV-2. While  
430 controversially discussed to which extent, children do become infected and shed the virus, despite  
431 them rarely being severely affected. In any case, preventing infection or virus shedding from  
432 vaccinated children can also help to contain the disease and protect vulnerable patient groups.  
433 Moreover, the capacity to produce large amounts of vaccine doses would be available more or less  
434 instantly from routine measles vaccine production, but at no impairment of production of other  
435 necessary vaccines, since the measles vaccine property is preserved in the proposed vaccine  
436 candidate. Especially since vaccination against the measles should not be impaired also during the  
437 COVID-19 epidemic, this is a considerable advantage. Otherwise, parallel epidemics with another,  
438 even more contagious respiratory virus are looming when vaccination programs against the  
439 measles are stopped in favour of COVID-19 vaccination programs. Therefore, MeV<sub>vac2</sub>-SARS2-  
440 S(H) is a promising vaccine candidate that warrants further investigation.

441

## 442 **Materials and Methods**

443

### 444 **Cells**

445 Vero (African green monkey kidney) (ATCC# CCL-81), Vero clone E6 (ATCC# CRL-1586), 293T  
446 (ATCC CRL-3216) and EL-4 (ATCC TIB-39) cell lines were purchased from ATCC (Manassas, VA,  
447 USA) and cultured in Dulbecco's modified Eagle's medium (DMEM, Biowest, Nuaille, France)  
448 supplemented with 10% fetal bovine serum (FBS; Biochrom, Berlin, Germany) and 2 mM L-  
449 glutamine (L-Gln; Biochrom). JAWSII mouse dendritic cells (ATCC CRL-11904) were also  
450 purchased from ATCC and cultured in MEM- $\alpha$  (GIBCO BRL, Eggenstein, Germany) supplemented  
451 with 20% FBS, 2 mM L-Gln, 1 mM sodium pyruvate (Biochrom), and 5 ng/ml murine GM-CSF  
452 (Biotechne, Wiesbaden, Germany). DC2.4 mouse dendritic cells (34) were cultured in RPMI  
453 containing 10% FBS, 2 mM L-Gln, 1% non-essential amino acids (Biochrom), 10 mM HEPES (pH  
454 7.4), and 50  $\mu$ M 2-mercaptoethanol (Sigma-Aldrich, Steinheim, Germany). All cells were cultured  
455 at 37°C in a humidified atmosphere containing 6% CO<sub>2</sub> for a maximum of 6 months of culture after  
456 thawing of the original stock.

### 457 **Plasmids**

458 The codon-optimized gene encoding full-length SARS-CoV-2 Spike glycoprotein S of isolate  
459 Wuhan-Hu-1 (Genebank accession no. MN908947.1) in plasmids pMA-RQ-SARS2-S flanked with  
460 *AatII/MluI* and *NheI/XhoI* restriction sites was obtained by gene synthesis (Invitrogen Life  
461 Technology, Regensburg, Germany). The antigen was inserted into plasmids pBRPolIII $\Delta$ -MV<sub>vac2</sub>-  
462 GFP(P) or pBRPolIII $\Delta$ MV<sub>vac2</sub>-GFP(H) via *MluI/AatII* to generate pBRPolIII-MV<sub>vac2</sub>-SARS2-S(P) or  
463 pBRPolIII-MV<sub>vac2</sub>-SARS2-S(H). pBRPolIII $\Delta$ -MV<sub>vac2</sub>-GFP(P) or pBRPolIII $\Delta$ MV<sub>vac2</sub>-GFP(H) were  
464 generated by inserting the immediate early CMV promoter sequence from p(+)*PolIII*-MV<sub>NSe</sub>-GFP(N)  
465 (35), which had been modified by site-directed mutagenesis for deleting the *AatII* restriction sites,  
466 into pBR-MV<sub>vac2</sub>-GFP(P) or pBR-MV<sub>vac2</sub>-GFP(H) (7). For construction of a lentiviral transfer vector  
467 encoding SARS-CoV-2 S directly linked to the *egfp* gene as selection marker, the ORF of SARS-  
468 CoV-2 S was inserted via *NheI/XhoI* into pCSCW2gluc-IRES-GFP (36) to yield pCSCW2-SARS2-  
469 S-IRES-GFP. For construction of a eukaryotic expression plasmid encoding SARS-CoV-2-S, the  
470 ORF of SARS2-S was inserted via *NheI/XhoI* into pcDNA3.1(+) (Invitrogen Life Technology) to  
471 yield pcDNA3.1-SARS2-S.

### 472 **Production of lentiviral vectors and generation of antigen-expressing dendritic cell lines**

473 Lentiviral vectors were produced and used for the generation of antigen-expressing dendritic cell  
474 lines as described before (7). In short, HIV-1-derived particles pseudotyped with VSV-G were  
475 generated using a standard three plasmid system, pMD2.G, pCMV $\Delta$ R8.9 (37) with the transfer  
476 vector plasmid pCSCW2-SARS2-S-IRES-GFP in combination with PEI transfection of 293T cells

477 (38). Subsequent purification by filtration and ultracentrifugation of supernatants yielded virus  
478 stocks were used to transduce murine DC cell lines, DC2.4 and JAWSII, as well as the murine T  
479 cell line EL-4, resulting in DC2.4-SARS2-S, JAWSII-SARS2-S, and EL-4<sub>green</sub>-SARS2-S,  
480 respectively, that express the SARS-CoV-2 S protein and GFP and present the respective peptides  
481 via MHC-I. Transduced cultures with 1-10% GFP-positive cells were single cell-sorted (BD FACS  
482 Aria™ Fusion) for GFP-expressing cells and subsequently characterized for antigen expression.  
483 For JAWSII-SARS2-S, the bulk-sorted cells were used in stimulation experiments. For DC2.4-  
484 SARS2-S and EL-4<sub>green</sub>-SARS2-S, clonal cell lines were generated by limiting dilution of bulk-sorted  
485 cells and characterized for marker- and antigen-expression.

#### 486 **Viruses**

487 SARS-CoV-2 S-encoding vaccine candidates MeV<sub>vac2</sub>-SARS2-S(P) or MeV<sub>vac2</sub>-SARS2-S(H) were  
488 generated as described previously (7, 39). Single syncytia were picked and overlaid onto 50%  
489 confluent Vero cells cultured in 6-well plates and harvested as “passage 0” (P0) by scraping and  
490 freeze-thaw cycle of cells at the time of maximal infection. Subsequent passages were generated  
491 after TCID<sub>50</sub> titration of infectious virus according to the method of Kaerber and Spaerman (40).  
492 Stocks were generated by infection of Vero cells at an MOI = 0.03, and passage 2 (P2) or P3 were  
493 used for *in vitro* characterization, while vaccine viruses in P3 or P4 were used for vaccination  
494 experiments. Vector control virus MV<sub>vac2</sub>-ATU(P) (41) was used in P5 for vaccination. SARS-CoV-  
495 2 (isolate MUC-IMB1) (kind gift of G. Dobler, Bundeswehr Insitute for Microbiology, Germany) was  
496 used for SARS-CoV-2 neutralization assays. It was propagated on Vero E6 cells and was titrated  
497 via TCID<sub>50</sub> as described above for recombinant MeV. All virus stocks were stored in aliquots at -  
498 80°C.

499 Multistep viral growth kinetics were analyzed by infecting Vero cells at an MOI of 0.03 in 96-well  
500 plates and incubated at 37°C. At various time points, supernatants were clarified by centrifugation,  
501 and cells were scraped into OptiMEM and subjected to freeze-thaw cycles. Released and cell-  
502 associated viral titers were determined by TCID<sub>50</sub> limited dilution method.

#### 503 **Measles virus genome sequence analysis**

504 The RNA genomes of recombinant MeV in P2 or P10 were isolated from infected Vero cells using  
505 the QIAamp Viral RNA Mini Kit (QIAGEN, Hilden, Germany) according to the manufacturer's  
506 instructions and resuspended in 50 µL RNase-free water. Viral cDNA was reversely transcribed  
507 using Superscript II RT kit (Invitrogen) with 2 µL viral RNA as template and random hexamer  
508 primers, according to manufacturer's instructions. For specific amplification of the SARS-CoV-2 S  
509 ORF, the respective genomic regions of recombinant MeV were amplified by PCR using primers  
510 binding to sequences flanking the regions of interest and the cDNA as template. Detailed

511 description of primers and procedures are available upon request. The PCR products were directly  
512 sequenced (Eurofins Genomics, Ebersberg, Germany).

### 513 **NGS library preparation and sequencing**

514 Total RNA was isolated from Vero cells after 4 days post infection using the Direct-zol RNA isolation  
515 kit (Zymo Research). 1 µg of RNA isolate was subjected to rRNA removal with the NEBNext rRNA  
516 Depletion Kit (NEB) using the manufacturer's recommendations. The whole 10 µl of the RNA elute  
517 was used for reverse transcription with Superscript III (Invitrogen) using the recommended reaction  
518 supplemented with 0.5 µl of RiboLock RNase Inhibitor (Thermo Scientific) and 100 pmol of NNSR-  
519 RT primer with the following protocol: 45°C 30 min; 70°C, 15 min. The cDNA was bead-purified  
520 with 1.8 volume of SPRI Beads (Beckman Coulter), eluted in 27 µl of water and subjected to RNase-  
521 H (NEB) digestion at 37°C for 30 min followed by heat inactivation. After bead purification the 20 µl  
522 cDNA elute was used for 2nd strand synthesis in a 50 µl reaction containing: 1x NEB Buffer 2, 25  
523 nmol dNTP, 5 U of exo(-) Klenow Fragment (NEB), 200 pmol of NNSR-2 Primer for 30 min at  
524 37°C. After bead purification half of the DNA elute was used for a 50-µl PCR reaction containing  
525 the NEBNext High-Fidelity 2x Master Mix (NEB), 25 pmol, each, of NNSR-Illumina and NNSR-nest-  
526 ind primers with the following cycling conditions: 98°C 10 sec; 5 cycles of 98°C 10 sec, 55°C 30  
527 sec, 72°C 30 sec; 20 cycles of 98°C 10 sec, 65°C 30 sec, 72°C 30 sec; 72°C 5 min. 15 µl of the  
528 PCR reaction was separated on a 1% agarose gel and the smear of 500-700 bp was isolated. The  
529 indexed libraries were quantified by qPCR using the NEBNext Library Quant Kit for Illumina (NEB,  
530 mixed and sequenced on a MiSeq instrument (Illumina)) with a 2x250 paired-end setup.

### 531 **RNA sequencing analysis**

532 Quality trimming and adapter removal were performed using fastp (v0.20.0 (42)). Read 1 and 2  
533 adapter recognition sequences were provided for adapter removal (Illumina TruSeq Adapter Read  
534 1:

535 AGATCGGAAGAGCACACGTCTGAACTCCAGTCACNNNNNNATCTCGTATGCCGTCTTCTGCT  
536 TG, Illumina TruSeq Adapter Read 2: AGATCGGAAGAGCGTCGTGTAGGGAAAGAGTGT;  
537 NNNNNN: sample-specific index) and the leading two nucleotides were removed from each read  
538 (--trim\_front1 2 --trim\_front2 2). For quality trimming, bases in sliding windows with a mean quality  
539 below 30 (-5 -3 --cut\_mean\_quality 30) were discarded on both sides of the reads. Base correction  
540 in overlapping regions (-c) was applied. Reads with Ns and a length below < 30 bp after trimming  
541 (-n 0 -l 30) were discarded.

542 Mapping was performed with BWA mem v 0.7.12-r1039 (43), using default parameters unless  
543 stated otherwise. Host-derived reads were removed by mapping quality controlled reads against  
544 the African green monkey genome (*Chlorocebus sabeus*, RefSeq assembly GCA\_000409795.2),  
545 specifying the minimum seed length (-k 31). Unmapped reads were extracted using samtools v1.7



546 (44) and bamToFastq v2.17.0 (45), and subsequently mapped to the plasmid reference genomes  
547 of either MeV<sub>vac2</sub>-SARS2-S(H) or MeV<sub>vac2</sub>-SARS2-S(P), as appropriate. Host-free alignments were  
548 deduplicated using picard-tools MarkDuplicates (<http://broadinstitute.github.io/picard>) and left-  
549 aligned using GATK LeftAlignIndels v4.0 (46).  
550 Sample majority consensus sequences were obtained by substituting minor frequency variants in  
551 the respective virus reference sequence for alternative variants with allele frequencies > 50%.  
552 Variant calling was performed with LoFreq v2.1.3 (47) using default parameters.

### 553 **Immunoperoxidase monolayer assay (IPMA)**

554 For immunoperoxidase monolayer assay, Vero cells cultured in flat-bottom 12-well plates were  
555 fixed overnight with methanol at -20°C two days after infection with a MOI of 0.01. The fixed cells  
556 were then washed three times with 1 mL PBS and subsequently blocked with PBS containing 2%  
557 bovine serum albumin (BSA) (Roth, Karlsruhe, Germany) for 30 min at 37°C. The cells were then  
558 probed for 1 h with a polyclonal rabbit anti-SARS-CoV-2-S protein antibody (1:2,250; ab252690;  
559 Abcam, Cambridge, UK) or a rabbit anti-MeV N protein antibody (1:1,000, ab23974, Abcam) in  
560 PBS with 2% BSA. The cells were washed 3 times with 1 ml PBS and subsequently incubated with  
561 the secondary HRP-coupled donkey anti-rabbit IgG(H+L) polyclonal antibody (1:1,000; 611-7202;  
562 Rockland, Gilbertsville, USA) for 1 h at 37°C. Then, the cells were washed 3 times, again. For  
563 detection, the cells were stained with TrueBlue peroxidase substrate solution (SeraCare, Milford,  
564 USA).

### 565 **Western Blot Analysis**

566 Cells were lysed and immunoblotted as previously described (48). Rabbit anti-SARS-S protein  
567 antibody (1:3,000; ab252690; Abcam), rabbit anti-MeV-N protein polyclonal antibody (1:5,000;  
568 ab23974; Abcam), and a mouse anti-β-actin antibody (1:5,000; ab6276; Abcam) were used.  
569 Donkey anti-rabbit IgG-HRP (H&L) polyclonal antibody (1:10,000; 611-7202; Rockland) and goat  
570 anti-mouse IgG-HRP (1:10,000; A2554-1ML; Merck, Darmstadt, Germany) served as secondary  
571 antibodies. Peroxidase activity was visualized with an enhanced chemiluminescence detection kit  
572 (Thermo Scientific, Bremen, Germany) on ChemiDoc MP Imaging System (Biorad, Dreieich,  
573 Germany).

### 574 **Animal experiments**

575 All animal experiments were carried out in compliance with the regulations of German animal  
576 protection laws and as authorized by the RP Darmstadt in consideration of the ARRIVE guidelines.  
577 Six- to 12-week-old old, treatment-naive IFNAR<sup>-/-</sup>-CD46Ge mice (10) that are deficient for type I  
578 IFN receptor and transgenically express human CD46 were bred in-house under SPF conditions  
579 and regularly controlled by animal care takers and institutional veterinarians for general signs of

580 well-being, and animal weight was additionally controlled once a week during the experiments. For  
581 the experiments, animals were randomized for age- and sex-matched groups and housed in IVC  
582 cages in groups of 3 to 5 animals with nest packs as environmental enrichment at room temperature  
583 with regular 12 h day and night intervals. Group sizes were calculated based on statistical  
584 considerations to yield sufficient statistical power as authorized by the respective competent  
585 authority. These animals were inoculated intraperitoneally (i.p.) with  $1 \times 10^5$  TCID<sub>50</sub> of recombinant  
586 vaccine viruses in 200  $\mu$ l volume, or subcutaneously (s.c.) with 10  $\mu$ g recombinant SARS-CoV-2 S  
587 protein (Sino Biological Europe, Eschborn, Germany) adjuvanted with 500  $\mu$ g aluminium hydroxide  
588 (Alhydrogel adjuvant 2%, vac-alu-250, InvivoGen, San Diego, CA, USA) in 100  $\mu$ l volume on days  
589 0 and 28. 200  $\mu$ l blood was collected on days 0, and 28, while final serum was collected on day 49  
590 post initial immunization (p.i.). serum samples were stored at -20°C. Mice were euthanized on day  
591 49 p.i., and splenocytes were harvested for assessment of cellular immune responses.

#### 592 **Total IgG and IgG1/IgG2a quantification**

593 MeV bulk antigens (10  $\mu$ g/mL; Virion Serion, Würzburg) or recombinant SARS-CoV-2 S protein (5  
594  $\mu$ g/mL) were coated in 50  $\mu$ l carbonate buffer (Na<sub>2</sub>CO<sub>3</sub> 30 mM; NaHCO<sub>3</sub> 70 mM; pH 9.6) per well  
595 on Nunc Maxisorp® 96 well ELISA plates (ebioscience) and incubated overnight at 4°C. The plates  
596 were washed three times with 200  $\mu$ l ELISA washing buffer (PBS, 0.1% Tween 20 (w/v)) and  
597 blocked with 100  $\mu$ L Blocking buffer (PBS; 5% BSA; 0.1% Tween 20) for at least 2 h at room  
598 temperature. Mouse sera were 5-fold serially diluted in ELISA dilution buffer (PBS, 1% BSA, 0.1%  
599 Tween 20), and 50  $\mu$ L/well were used for the assay. The plates were incubated at 37°C for 2 h and  
600 washed three times with ELISA washing buffer, followed by incubation with 50  $\mu$ l/well of HRP-  
601 conjugated rabbit anti-mouse total IgG (1:1,000 in ELISA dilution buffer; P0260, Dako Agilent,  
602 Santa Clara, CA, USA), goat-anti-mouse IgG1 (1:8,000 in ELISA dilution buffer; ab97240, Abcam,  
603 Cambridge, UK), or goat-anti-mouse IgG2a (1:8,000 in ELISA dilution buffer; ab97245, Abcam) at  
604 room temperature for 1 h. Subsequently, the plates were washed four times and 100  $\mu$ L TMB  
605 substrate (ebioscience) was added per well. The reaction was stopped by addition of 50  $\mu$ L/well  
606 H<sub>2</sub>SO<sub>4</sub> (1 N) and the absorbance at 450 nm (specific signal) and 630nm (reference wavelength)  
607 was measured.

#### 608 **Th1/Th2 cytokine multiplex assay**

609 Quantification of Th1/Th2 cytokines in supernatant of splenocytes was performed using mouse  
610 high sensitivity T cell magnetic bead panel assay (MHSTCMAG-70K, Merck, Darmstadt, Germany).  
611  $5 \times 10^5$  isolated splenocytes were co-cultured with different stimuli in 200  $\mu$ L RPMI + 10% FBS, 2  
612 mM L-Gln, and 1% penicillin-streptomycin for 36 h. For re-stimulation of SARS-CoV-2 S protein-  
613 specific T cells, splenocytes were co-cultivated with  $5 \times 10^4$  DC2.4 dendritic cells, the corresponding

614 cell line transgenically expressing SARS-CoV-2 S protein or medium alone. After 36 h, cells were  
615 spun down and supernatants were collected and stored at -20°C till assayed. For multiplex assay,  
616 cytokines were coupled over night to magnetic beads coated with capture antibodies, labeled with  
617 biotinylated detection antibody and incubated with Streptavidin-PE conjugate. Fluorescence was  
618 measured using MAGPIX with xPONENT software (Luminex Instruments, Thermo Scientific,  
619 Bremen, Germany).

#### 620 **Neutralization Assay**

621 Virus neutralizing titers (VNT) were quantified as described previously (7). Towards this, sera were  
622 serially diluted in 2-fold dilution steps in DMEM in duplicates. A total of 50 PFU of MV<sub>vac2</sub>-GFP(P)  
623 or 100 TCID<sub>50</sub> of SARS-CoV-2 (isolate MUC-IMB1) were mixed with diluted sera and incubated at  
624 37°C for 1 h. MeV or SARS-CoV-2 virus-serum suspensions were added to 1×10<sup>4</sup> Vero or Vero E6  
625 cells, respectively, seeded 4 h prior to the assay in 96-well plates and incubated for 4 days at 37°C.  
626 VNTs were calculated as the reciprocal of the highest mean dilution that abolished infection.

#### 627 **IFN-γ ELISpot Analysis**

628 Murine interferon gamma (IFN-γ) enzyme-linked immunosorbent spot (ELISpot) assays were  
629 performed using the Mouse IFN-γ ELISPOT Pair kit including capture and detection antibody (BD  
630 Bioscience, Franklin Lakes, NJ, USA) and HRP Streptavidin (BD Bioscience) for ELISpot detection  
631 in combination with multiscreen immunoprecipitation (IP) ELISpot polyvinylidene difluoride (PVDF)  
632 96-well plates (Merck Millipore, Darmstadt, Germany) according to the manufacturer's instructions.  
633 5×10<sup>5</sup> isolated splenocytes were co-cultured with different stimuli in 200 μL RPMI + 10% FBS, 2  
634 mM L-Gln, and 1% penicillin-streptomycin for 36 h. For re-stimulation of SARS-CoV-2 S protein-  
635 specific T cells, splenocytes were co-cultivated with 5×10<sup>4</sup> JAWSII, DC2.4 dendritic cells, or the  
636 corresponding cell lines transgenically expressing SARS-CoV-2 S protein. In parallel, splenocytes  
637 were stimulated with 10 μg/mL MeV bulk antigen (Virion Serion). For general T cell stimulation, 10  
638 μg/mL concanavalin A (ConA, Sigma-Aldrich) was used, and as negative control, splenocytes were  
639 left untreated. After 36 h, cells were spun down, supernatants were removed, and cells were lysed  
640 in the wells by hypotonic shock. Plates were incubated with biotin-conjugated anti-IFN-γ detection  
641 antibodies and streptavidin-HRP according to the manufacturer's instructions. 3-Amino-9-ethyl-  
642 carbazole (AEC; Sigma-Aldrich) was dissolved in N,N-dimethylformamide (Merck Millipore) and  
643 used for peroxidase-dependent staining. Spots were counted using an Eli.Scan ELISpot scanner  
644 (AE.L.VIS, Hamburg, Germany) and ELISpot analysis software Eli.Analyse V5.0 (AE.L.VIS).

#### 645 **Intracellular cytokine staining**

646 For flow cytometry-based analysis of cytokine expression by intracellular cytokine staining (ICS),  
647 splenocytes of vaccinated mice were isolated, and 2×10<sup>6</sup> splenocytes per mouse were cultivated

648 in 200  $\mu$ L RPMI1640 + 10% FBS, 2 mM L-Gln, 1 $\times$  non-essential amino acids (Biochrom), 10 mM  
649 HEPES, 1% penicillin-streptomycin, 50  $\mu$ M  $\beta$ -mercaptoethanol, 10  $\mu$ g/mL brefeldin A (Sigma-  
650 Aldrich) with DC2.4-SARS2-S cells as used for ELISpot analysis. For general T cell stimulation,  
651 0.25  $\mu$ g/mL tetradecanoylphorbol acetate (TPA, Sigma Aldrich) and 0.5  $\mu$ g/mL ionomycin (Iono,  
652 Sigma-Aldrich) were used as positive control, and medium alone served as negative control.  
653 Splenocytes were stimulated for 5 h at 37°C. Subsequently, cells were stained with fixable viability  
654 dye eFluor450 (eBioscience),  $\alpha$ -CD4-PE (1:2,000; Cat.-No. 553049 BD, Franklin Lakes, NJ, USA),  
655  $\alpha$ -CD8-FITC (1:500; Cat.-No. 553031, BD), and  $\alpha$ -CD3-PerCPCy5.5 (1:500; Cat.-No. 550763, BD).  
656 Subsequent to permeabilization with Fixation/Permeabilization Solution (BD) and Perm/Wash  
657 Buffer (BD), cells were stained with  $\alpha$ -IFN- $\gamma$ -APC (1:500; Cat.-No. 554413, BD),  $\alpha$ -IL-2-  
658 AlexaFluor700 (1:200; Cat.-No. 503818, Biolegend, San Diego, USA) and  $\alpha$ -TNF- $\alpha$ -Pe-Cy7 (1:500;  
659 Cat.-No. 557644, BD). Cells were fixed with ice-cold 1% paraformaldehyde (PFA) in PBS and  
660 analyzed via flow cytometry using an LSR II SORP flow cytometer (BD) and DIVA software (BD).

#### 661 **T cell proliferation assay**

662 Splenocytes isolated three weeks after the second immunization were labeled with 0.5  $\mu$ M  
663 carboxyfluorescein-succinimidyl-ester (CFSE) (ebioscience, Life Technologies, Carlsbad, CA,  
664 USA) as previously described (49). In brief, 5 $\times$ 10<sup>5</sup> labelled cells were seeded in RPMI 1640  
665 supplemented with 10% mouse serum, 2 mM L-Glutamine, 10 mM HEPES, 1%  
666 penicillin/streptomycin, and 100  $\mu$ M 2-mercaptoethanol in 96-wells. 200  $\mu$ L Medium containing 10  
667  $\mu$ g/ml Concanavalin A (Con A, Sigma-Aldrich), 10  $\mu$ g/ml MeV bulk antigen (Virion Serion), or 5 $\times$ 10<sup>3</sup>  
668 DC2.4-SARS2-S cells were added to each well, and cultured for 6 days. Medium and wild type  
669 DC2.4 and JAWSII cells served as controls. Stimulated cells were subsequently stained with CD3-  
670 PacBlue (1:50; clone 500A2; Invitrogen Life Technologies), CD8-APC (1:100; clone 53-6.7;  
671 ebioscience) and CD4-PE (1:2000; Cat. 553049; BD) antibodies and fixed with 1% PFA in PBS.  
672 Finally, the stained cells were analyzed by flow cytometry using an LSR II flow cytometer (BD) and  
673 FCS Express software (De Novo Software).

#### 674 **CTL killing assay**

675 For re-stimulation of T cells isolated 3 weeks after the second immunization, 5 $\times$ 10<sup>6</sup> splenocytes  
676 were co-cultured with 5 $\times$ 10<sup>4</sup> DC2.4-SARS2-S cells for 6 days in 12-wells in RPMI 1640  
677 supplemented with 10% FBS, 2 mM L-Glutamin, 1 mM HEPES, 1% penicillin/streptomycin, 100  $\mu$ M  
678 2-mercaptoethanol, and 100 U/ml murine rIL-2 (Peprotech, Hamburg, Germany). 5 $\times$ 10<sup>3</sup> EL-4<sub>red</sub>  
679 cells were labeled with 0.5  $\mu$ M CFSE and mixed with 5 $\times$ 10<sup>3</sup> EL-4<sub>green</sub>-SARS2-S cells per well.  
680 Splenocytes were counted and co-cultured with EL-4 target cells at the indicated ratios for 4 h at  
681 37°C. Afterwards, EL-4 cells were labeled with Fixable Viability Dye eFluor® 780 (ebioscience),

682 fixed with 1% paraformaldehyde (PFA), and analyzed by flow cytometry using an LSR II flow  
683 cytometer (BD) and FCS Express. For indication of Antigen:NC EL-4 ratio the cell count of viable  
684 SARS-CoV-2 S-expressing cells was divided by the population of viable negative controls.

#### 685 **Statistical analyses**

686 To compare the means of different groups in growth kinetics, a non-parametric One-way ANOVA  
687 was performed. For ICS analysis, the non-parametric two-tailed Mann-Whitney test was used to  
688 compare cytokines levels between DC2.4 and DC2.4-SARS2-S- restimulated splenocytes within  
689 the MeV<sub>-vac2</sub>-SARS-2-S(H) vaccine group. Note, that these exploratory analyses have been done  
690 without correction for multiple testing. For proliferation assay the mean differences were calculated  
691 and analyzed using one-tailed Mann-Whitney t-test. To all three groups in CTL killing assays a  
692 linear curve was fitted for antigen vs. logarithmised effector-target ratio E:T. The p values testing  
693 for differences in slopes were calculated and populations of SARS2-S(H) compared with control  
694 ATU vaccinated cells. The p values were not adjusted for multiplicity due to the explorative  
695 character of the study. For VNT and fusion activity statistical analysis, one-way ANOVA was  
696 performed in combination with Tukey's Multi comparison test to compare all pair means. For  
697 multiplex statistical analysis, two-way ANOVA analysis was applied with paired Tukey's Multi  
698 comparison test as post hoc test. For statistical analysis of grouped ELISpot data, two-way ANOVA  
699 analysis was applied with paired Tukey's Multi comparison test.

700

## 701 Acknowledgments

702

703 This work was supported by the German Center for Infection Research (DZIF; TTU 01.805, TTU  
704 01.922\_00). The authors would like to thank Daniela Müller and Carina Kruij for excellent technical  
705 assistance, Björn Becker for assistance in multiplex analysis, Csabas Miskey for assistance with  
706 NGS, Christel Kamp for excellent advice on statistics, and Marcel Rommel for cell sorting. The  
707 authors are indebted to Gerhard Dobler for providing SARS-CoV-2 isolate MUC-IMB1, Maria  
708 Vehreschild for human patient reconvalescent serum, Kenneth Rock for DC2.4 cells, Roberto  
709 Cattaneo for providing the pBR(+)MV<sub>vac2</sub> construct, and Urs Schneider for providing the PolII rescue  
710 system used to generate and to rescue recombinant MeV vectors. The authors would further like  
711 to thank Bakhos Tannous for providing pCSCW2gluc-IRES-GFP. Moreover, the authors would like  
712 to thank Roberto Cattaneo and Veronika von Messling for valuable comments on the manuscript.

713

714

## 715 References

716

- 717 1. F. Wu, S. Zhao, B. Yu, Y.-M. Chen, W. Wang, Z.-G. Song, Y. Hu, Z.-W. Tao, J.-H. Tian, Y.-Y.  
718 Pei, M.-L. Yuan, Y.-L. Zhang, F.-H. Dai, Y. Liu, Q.-M. Wang, J.-J. Zheng, L. Xu, E. C. Holmes,  
719 Y.-Z. Zhang, A new coronavirus associated with human respiratory disease in China. *Nature*  
720 **579**, 265–269 (2020).
- 721 2. Q. Li, X. Guan, P. Wu, X. Wang, L. Zhou, Y. Tong, R. Ren, K. S. M. Leung, E. H. Y. Lau, J. Y.  
722 Wong, X. Xing, N. Xiang, Y. Wu, C. Li, Q. Chen, D. Li, T. Liu, J. Zhao, M. Liu, W. Tu, C. Chen,  
723 L. Jin, R. Yang, Q. Wang, S. Zhou, R. Wang, H. Liu, Y. Luo, Y. Liu, G. Shao, H. Li, Z. Tao, Y.  
724 Yang, Z. Deng, B. Liu, Z. Ma, Y. Zhang, G. Shi, T. T. Y. Lam, J. T. Wu, G. F. Gao, B. J.  
725 Cowling, B. Yang, G. M. Leung, Z. Feng, Early Transmission Dynamics in Wuhan, China, of  
726 Novel Coronavirus-Infected Pneumonia. *The New England journal of medicine* **382**, 1199–  
727 1207 (2020).
- 728 3. R. Li, S. Pei, B. Chen, Y. Song, T. Zhang, W. Yang, J. Shaman, Substantial undocumented  
729 infection facilitates the rapid dissemination of novel coronavirus (SARS-CoV-2).  
730 10.5281/ZENODO.3699624 (2020).
- 731 4. M. D. Mühlebach, Vaccine platform recombinant measles virus. *Virus genes* **53**, 733–740  
732 (2017).
- 733 5. N. Escriou, B. Callendret, V. Lorin, C. Combredet, P. Marianneau, M. Février, F. Tangy,  
734 Protection from SARS coronavirus conferred by live measles vaccine expressing the spike  
735 glycoprotein. *Virology* **452-453**, 32–41 (2014).
- 736 6. M. Liniger, A. Zuniga, A. Tamin, T. N. Azzouz-Morin, M. Knuchel, R. R. Marty, M. Wiegand, S.  
737 Weibel, D. Kelvin, P. A. Rota, H. Y. Naim, Induction of neutralising antibodies and cellular  
738 immune responses against SARS coronavirus by recombinant measles viruses. *Vaccine* **26**,  
739 2164–2174 (2008).

- 740 7. A. H. Malczyk, A. Kupke, S. Prüfer, V. A. Scheuplein, S. Hutzler, D. Kreuz, T. Beissert, S.  
741 Bauer, S. Hubich-Rau, C. Tondera, H. S. Eldin, J. Schmidt, J. Vergara-Alert, Y. Süzer, J.  
742 Seifried, K.-M. Hanschmann, U. Kalinke, S. Herold, U. Sahin, K. Cichutek, Z. Waibler, M.  
743 Eickmann, S. Becker, M. D. Mühlebach, A Highly Immunogenic and Protective Middle East  
744 Respiratory Syndrome Coronavirus Vaccine Based on a Recombinant Measles Virus Vaccine  
745 Platform. *Journal of virology* **89**, 11654–11667 (2015).
- 746 8. B. S. Bodmer, A. H. Fiedler, J. R. H. Hanauer, S. Prüfer, M. D. Mühlebach, Live-attenuated  
747 bivalent measles virus-derived vaccines targeting Middle East respiratory syndrome  
748 coronavirus induce robust and multifunctional T cell responses against both viruses in an  
749 appropriate mouse model. *Virology* **521**, 99–107 (2018).
- 750 9. S. Heidmeier, J. R. H. Hanauer, K. Friedrich, S. Prüfer, I. C. Schneider, C. J. Buchholz, K.  
751 Cichutek, M. D. Mühlebach, A single amino acid substitution in the measles virus F<sub>2</sub> protein  
752 reciprocally modulates membrane fusion activity in pathogenic and oncolytic strains (2014).
- 753 10. B. Mrkic, J. Pavlovic, T. Rüllicke, P. Volpe, C. J. Buchholz, D. Hourcade, J. P. Atkinson, A.  
754 Aguzzi, R. Cattaneo, Measles Virus Spread and Pathogenesis in Genetically Modified Mice  
755 (1998).
- 756 11. P. Marrack, A. S. McKee, M. W. Munks, Towards an understanding of the adjuvant action of  
757 aluminium. *Nature reviews. Immunology* **9**, 287–293 (2009).
- 758 12. P. He, Y. Zou, Z. Hu, Advances in aluminum hydroxide-based adjuvant research and its  
759 mechanism. *Human vaccines & immunotherapeutics* **11**, 477–488 (2015).
- 760 13. R.-D. Jiang, M.-Q. Liu, Y. Chen, C. Shan, Y.-W. Zhou, X.-R. Shen, Q. Li, L. Zhang, Y. Zhu, H.-  
761 R. Si, Q. Wang, J. Min, X. Wang, W. Zhang, B. Li, H.-J. Zhang, R. S. Baric, P. Zhou, X.-L.  
762 Yang, Z.-L. Shi, Pathogenesis of SARS-CoV-2 in Transgenic Mice Expressing Human  
763 Angiotensin-Converting Enzyme 2. *Cell*. 10.1016/j.cell.2020.05.027 (2020).
- 764 14. M. Mura, C. Ruffié, E. Billon-Denis, C. Combredet, J. N. Tournier, F. Tangy, hCD46 receptor is  
765 not required for measles vaccine Schwarz strain replication in vivo: Type-I IFN is the species  
766 barrier in mice. *Virology* **524**, 151–159 (2018).
- 767 15. A. Le Bon, G. Schiavoni, G. D'Agostino, I. Gresser, F. Belardelli, D. F. Tough, Type I  
768 Interferons Potently Enhance Humoral Immunity and Can Promote Isotype Switching by  
769 Stimulating Dendritic Cells In Vivo (2001).
- 770 16. I. J. Amanna, N. E. Carlson, M. K. Slifka, Duration of Humoral Immunity to Common Viral and  
771 Vaccine Antigens (2007).
- 772 17. S. Carryn, M. Feysaguet, M. Povey, E. Di Paolo, Long-term immunogenicity of measles,  
773 mumps and rubella-containing vaccines in healthy young children: A 10-year follow-up.  
774 *Vaccine* **37**, 5323–5331 (2019).
- 775 18. S. J. Russell, M. J. Federspiel, K.-W. Peng, C. Tong, D. Dingli, W. G. Morice, V. Lowe, M. K.  
776 O'Connor, R. A. Kyle, N. Leung, F. K. Buadi, S. V. Rajkumar, M. A. Gertz, M. Q. Lacy, A.  
777 Dispenzieri, Remission of disseminated cancer after systemic oncolytic virotherapy. *Mayo*  
778 *Clinic proceedings* **89**, 926–933 (2014).
- 779 19. P. Msaouel, M. Opyrchal, A. Dispenzieri, K. W. Peng, M. J. Federspiel, S. J. Russell, E.  
780 Galanis, Clinical Trials with Oncolytic Measles Virus: Current Status and Future Prospects.  
781 *Current cancer drug targets* **18**, 177–187 (2018).

- 782 20.A. Dispenzieri, C. Tong, B. LaPlant, M. Q. Lacy, K. Laumann, D. Dingli, Y. Zhou, M. J.  
783 Federspiel, M. A. Gertz, S. Hayman, F. Buadi, M. O'Connor, V. J. Lowe, K.-W. Peng, S. J.  
784 Russell, Phase I trial of systemic administration of Edmonston strain of measles virus  
785 genetically engineered to express the sodium iodide symporter in patients with recurrent or  
786 refractory multiple myeloma. *Leukemia* **31**, 2791–2798 (2017).
- 787 21.D. E. Griffin, W.-H. W. Lin, A. N. Nelson, Understanding the causes and consequences of  
788 measles virus persistence (2018).
- 789 22.K. Ramsauer, M. Schwameis, C. Firbas, M. Müllner, R. J. Putnak, S. J. Thomas, P. Desprès,  
790 E. Tauber, B. Jilma, F. Tangy, Immunogenicity, safety, and tolerability of a recombinant  
791 measles-virus-based chikungunya vaccine: a randomised, double-blind, placebo-controlled,  
792 active-comparator, first-in-man trial. *The Lancet Infectious Diseases* **15**, 519–527 (2015).
- 793 23.E. C. Reisinger, R. Tschismarov, E. Beubler, U. Wiedermann, C. Firbas, M. Loebermann, A.  
794 Pfeiffner, M. Muellner, E. Tauber, K. Ramsauer, Immunogenicity, Safety, and Tolerability of  
795 the Measles-Vectored Chikungunya Virus Vaccine MV-CHIK: A Double-Blind, Randomised,  
796 Placebo-Controlled and Active-Controlled Phase 2 Trial (2019).
- 797 24.M. Hoffmann, H. Kleine-Weber, S. Schroeder, N. Krüger, T. Herrler, S. Erichsen, T. S.  
798 Schiergens, G. Herrler, N.-H. Wu, A. Nitsche, M. A. Müller, C. Drosten, S. Pöhlmann, SARS-  
799 CoV-2 Cell Entry Depends on ACE2 and TMPRSS2 and Is Blocked by a Clinically Proven  
800 Protease Inhibitor. *Cell* **181**, 271-280.e8 (2020).
- 801 25.D. Wrapp, Wang, Nianshuang, Corbett, Kizzmekia S., J. A. Goldsmith, C.-L. Hsieh, O. Abiona,  
802 B. S. Graham, J. S. McLellan, Cryo-EM structure of the 2019-nCoV spike in the prefusion  
803 conformation **60** (2020).
- 804 26.J. Yu, L. H. Tostanoski, L. Peter, N. B. Mercado, K. McMahan, S. H. Mahrokhian, J. P.  
805 Nkolola, J. Liu, Z. Li, A. Chandrashekar, D. R. Martinez, C. Loos, C. Atyeo, S. Fischinger, J. S.  
806 Burke, M. D. Slein, Y. Chen, A. Zuiani, F. J. N Lelis, M. Travers, S. Habibi, L. Pessaint, A. van  
807 Ry, K. Blade, R. Brown, A. Cook, B. Finneyfrock, A. Dodson, E. Teow, J. Velasco, R. Zahn, F.  
808 Wegmann, E. A. Bondzie, G. Dagotto, M. S. Gebre, X. He, C. Jacob-Dolan, M. Kirilova, N.  
809 Kordana, Z. Lin, L. F. Maxfield, F. Nampanya, R. Nityanandam, J. D. Ventura, H. Wan, Y. Cai,  
810 B. Chen, A. G. Schmidt, D. R. Wesemann, R. S. Baric, G. Alter, H. Andersen, M. G. Lewis, D.  
811 H. Barouch, DNA vaccine protection against SARS-CoV-2 in rhesus macaques. *Science (New*  
812 *York, N. Y.)*. 10.1126/science.abc6284 (2020).
- 813 27.N. M. A. Okba, M. A. Müller, W. Li, C. Wang, C. H. GeurtsvanKessel, V. M. Corman, M. M.  
814 Lamers, R. S. Sikkema, E. de Bruin, F. D. Chandler, Y. Yazdanpanah, Q. Le Hingrat, D.  
815 Descamps, N. Houhou-Fidouh, C. B. E. M. Reusken, B.-J. Bosch, C. Drosten, M. P. G.  
816 Koopmans, B. L. Haagmans, Severe Acute Respiratory Syndrome Coronavirus 2-Specific  
817 Antibody Responses in Coronavirus Disease Patients. *Emerging infectious diseases* **26**,  
818 1478–1488 (2020).
- 819 28.F. A. Rey, K. Stiasny, M.-C. Vaney, M. Dellarole, F. X. Heinz, The bright and the dark side of  
820 human antibody responses to flaviviruses: lessons for vaccine design. *EMBO reports* **19**, 206–  
821 224 (2018).
- 822 29.L. Liu, Q. Wei, Q. Lin, J. Fang, H. Wang, H. Kwok, H. Tang, K. Nishiura, J. Peng, Z. Tan, T.  
823 Wu, K.-W. Cheung, K.-H. Chan, X. Alvarez, C. Qin, A. Lackner, S. Perlman, K.-Y. Yuen, Z.



- 824 Chen, Anti-spike IgG causes severe acute lung injury by skewing macrophage responses  
825 during acute SARS-CoV infection. *JCI insight* **4** (2019).
- 826 30.D. Nanche, Human immunology of measles virus infection. *Curr Top Microbiol Immunol.*  
827 (2009).
- 828 31.L. Bao, W. Deng, B. Huang, H. Gao, J. Liu, L. Ren, Q. Wei, P. Yu, Y. Xu, F. Qi, Y. Qu, F. Li,  
829 Q. Lv, W. Wang, J. Xue, S. Gong, M. Liu, G. Wang, S. Wang, Z. Song, L. Zhao, P. Liu, L.  
830 Zhao, F. Ye, H. Wang, W. Zhou, N. Zhu, W. Zhen, H. Yu, X. Zhang, L. Guo, L. Chen, C.  
831 Wang, Y. Wang, X. Wang, Y. Xiao, Q. Sun, H. Liu, F. Zhu, C. Ma, L. Yan, M. Yang, J. Han, W.  
832 Xu, W. Tan, X. Peng, Q. Jin, G. Wu, C. Qin, The pathogenicity of SARS-CoV-2 in hACE2  
833 transgenic mice. *Nature*. 10.1038/s41586-020-2312-y (2020).
- 834 32.S. F. Sia, L.-M. Yan, A. W. H. Chin, K. Fung, K.-T. Choy, A. Y. L. Wong, P. Kaewpreedee, R.  
835 A. P. M. Perera, L. L. M. Poon, J. M. Nicholls, M. Peiris, H.-L. Yen, Pathogenesis and  
836 transmission of SARS-CoV-2 in golden hamsters. *Nature*. 10.1038/s41586-020-2342-5  
837 (2020).
- 838 33.J. F.-W. Chan, A. J. Zhang, S. Yuan, V. K.-M. Poon, C. C.-S. Chan, A. C.-Y. Lee, W.-M. Chan,  
839 Z. Fan, H.-W. Tsoi, L. Wen, R. Liang, J. Cao, Y. Chen, K. Tang, C. Luo, J.-P. Cai, K.-H. Kok,  
840 H. Chu, K.-H. Chan, S. Sridhar, Z. Chen, H. Chen, K. K.-W. To, K.-Y. Yuen, Simulation of the  
841 clinical and pathological manifestations of Coronavirus Disease 2019 (COVID-19) in golden  
842 Syrian hamster model: implications for disease pathogenesis and transmissibility (2020).
- 843 34.Z. Shen, G. Reznikoff, G. Dranoff, K. L. Rock, Cloned dendritic cells can present exogenous  
844 antigens on both MHC class I and class II molecules. *Journal of immunology (Baltimore, Md. :  
845 1950)* **158**, 2723–2730 (1997).
- 846 35.K. Friedrich, J. R. Hanauer, S. Prüfer, R. C. Münch, I. Völker, C. Filippis, C. Jost, K.-M.  
847 Hanschmann, R. Cattaneo, K.-W. Peng, A. Plückthun, C. J. Buchholz, K. Cichutek, M. D.  
848 Mühlebach, DARPin-targeting of measles virus: unique bispecificity, effective oncolysis, and  
849 enhanced safety. *Molecular therapy : the journal of the American Society of Gene Therapy* **21**,  
850 849–859 (2013).
- 851 36.J. W. Hewett, B. Tannous, B. P. Niland, F. C. Nery, J. Zeng, Y. Li, X. O. Breakefield, Mutant  
852 torsinA interferes with protein processing through the secretory pathway in DYT1 dystonia  
853 cells. *Proceedings of the National Academy of Sciences of the United States of America* **104**,  
854 7271–7276 (2007).
- 855 37.R. Zufferey, D. Nagy, R. J. Mandel, L. Naldini, D. Trono, Multiply attenuated lentiviral vector  
856 achieves efficient gene delivery in vivo (1997).
- 857 38.R. C. Münch, M. D. Mühlebach, T. Schaser, S. Kneissl, C. Jost, A. Plückthun, K. Cichutek, C.  
858 J. Buchholz, DARPins: an efficient targeting domain for lentiviral vectors. *Molecular therapy :  
859 the journal of the American Society of Gene Therapy* **19**, 686–693 (2011).
- 860 39.A. Martin, P. Staeheli, U. Schneider, RNA polymerase II-controlled expression of antigenomic  
861 RNA enhances the rescue efficacies of two different members of the Mononegavirales  
862 independently of the site of viral genome replication. *Journal of virology* **80**, 5708–5715  
863 (2006).
- 864 40.G. Kaerber, Beitrag zur kollektiven Behandlung pharmakologischer Reihenversuche (1931).

- 865 41. J. R. del Valle, P. Devaux, G. Hodge, N. J. Wegner, M. B. McChesney, R. Cattaneo, A  
866 vectored measles virus induces hepatitis B surface antigen antibodies while protecting  
867 macaques against measles virus challenge. *Journal of virology* **81**, 10597–10605 (2007).
- 868 42. S. Chen, Y. Zhou, Y. Chen, J. Gu, fastp: an ultra-fast all-in-one FASTQ preprocessor.  
869 *Bioinformatics (Oxford, England)* **34**, i884–i890 (2018).
- 870 43. H. Li, R. Durbin, Fast and accurate short read alignment with Burrows-Wheeler transform.  
871 *Bioinformatics (Oxford, England)* **25**, 1754–1760 (2009).
- 872 44. H. Li, B. Handsaker, A. Wysoker, T. Fennell, J. Ruan, N. Homer, G. Marth, G. Abecasis, R.  
873 Durbin, The Sequence Alignment/Map format and SAMtools. *Bioinformatics (Oxford, England)*  
874 **25**, 2078–2079 (2009).
- 875 45. A. R. Quinlan, I. M. Hall, BEDTools: a flexible suite of utilities for comparing genomic features.  
876 *Bioinformatics (Oxford, England)* **26**, 841–842 (2010).
- 877 46. A. McKenna, M. Hanna, E. Banks, A. Sivachenko, K. Cibulskis, A. Kernytsky, K. Garimella, D.  
878 Altshuler, S. Gabriel, M. Daly, M. A. DePristo, The Genome Analysis Toolkit: a MapReduce  
879 framework for analyzing next-generation DNA sequencing data. *Genome research* **20**, 1297–  
880 1303 (2010).
- 881 47. A. Wilm, P. P. K. Aw, D. Bertrand, G. H. T. Yeo, S. H. Ong, C. H. Wong, C. C. Khor, R. Petric,  
882 M. L. Hibberd, N. Nagarajan, LoFreq: a sequence-quality aware, ultra-sensitive variant caller  
883 for uncovering cell-population heterogeneity from high-throughput sequencing datasets.  
884 *Nucleic acids research* **40**, 11189–11201 (2012).
- 885 48. S. Funke, A. Maisner, M. D. Mühlebach, U. Koehl, M. Grez, R. Cattaneo, K. Cichutek, C. J.  
886 Buchholz, Targeted cell entry of lentiviral vectors. *Molecular therapy : the journal of the*  
887 *American Society of Gene Therapy* **16**, 1427–1436 (2008).
- 888 49. A. B. Lyons, C. R. Parish, Determination of lymphocyte division by flow cytometry. *Journal of*  
889 *immunological methods* **171**, 131–137 (1994).
- 890

891 **Figures**

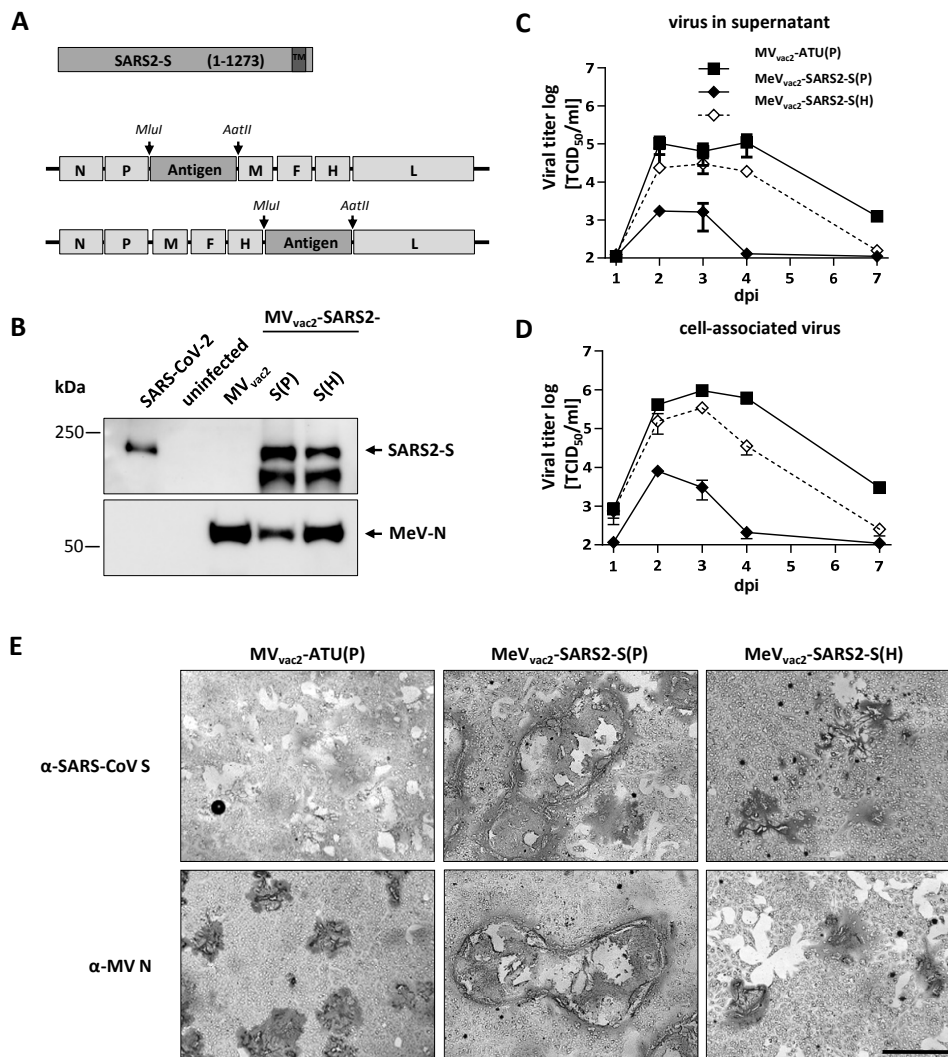

892  
893

894 **Fig. 1: Generation and *in vitro* characterization of MeV<sub>vac2</sub>-SARS2-S(P) and MeV<sub>vac2</sub>-SARS2-**  
 895 **S(H).** (A) Schematic depiction of full-length SARS-CoV-2 S and recombinant MeV<sub>vac2</sub> genomes  
 896 used for expression of this antigen (lower schemes). Antigen or antigen encoding genes are  
 897 depicted in dark grey; MeV viral gene cassettes (in light grey) are annotated. *MluI* and *AatII*  
 898 restriction sites used for cloning of antigen-genes into post P or post H ATU are highlighted (B)  
 899 Immunoblot analysis of Vero cells infected at an MOI of 0.01 with MeV<sub>vac2</sub>-SARS2-S(P), MeV<sub>vac2</sub>-  
 900 SARS2-S(H), or MV<sub>vac2</sub>-ATU(P) (MV<sub>vac2</sub>) as depicted above lanes. Uninfected cells served as mock.  
 901 Blots were probed using rabbit polyclonal anti-SARS spike antibody (upper blot) or mAb reactive  
 902 against MeV-N (lower blot). Arrows indicate specific bands. (C, D) Growth kinetics of recombinant  
 903 MeV on Vero cells infected at an MOI of 0.03 with MV<sub>vac2</sub>-ATU(P) or MeV<sub>vac2</sub>-SARS2-S encoding  
 904 extra genes in post H or post P. Titers of samples prepared at indicated time points post infection  
 905 were titrated on Vero cells. Means and standard deviations of three to five independent experiments

906 are presented. (E) SARS-CoV-2 S protein expression in Vero cells was verified via  
907 immunoperoxidase monolayer assay. 50× magnification; scale bar, 500 μm.

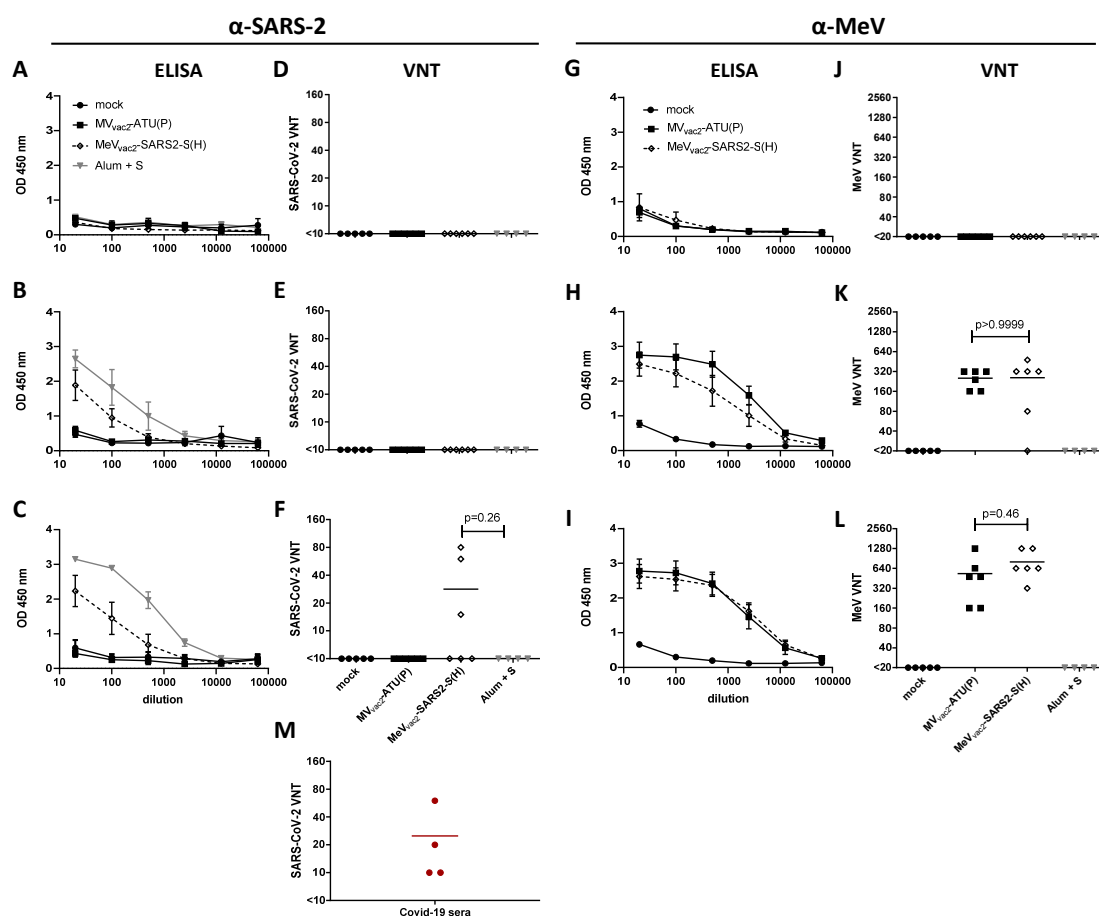

908

909 **Fig. 2:** Induction of a-SARS-CoV-2 S and a-MeV specific antibodies. Sera of mice vaccinated on  
 910 days 0 and 28 with indicated viruses or Alum-adjuvanted S protein were sampled on day 0 (A, D,  
 911 E, F), day 28 after prime- (B, E, H, K) and day 49 after boost-immunization (C, F, I, L) and analyzed  
 912 for antibodies specific for SARS-CoV-2 S or MeV. Medium-inoculated mice served as mock. Pan-  
 913 IgG binding to recombinant SARS-CoV S (A – C) or MeV bulk antigens (G – I) were determined by  
 914 ELISA via the specific OD 450 nm value. Depicted are means and respective standard deviation of  
 915 the mean (SEM) of each group (n = 5 - 6). Virus neutralizing titers (VNT) in vaccinated mice for  
 916 SARS-CoV-2 (D - F) or MeV (J – L) were calculated as reciprocal of the highest dilution abolishing  
 917 infectivity. (M) SARS-CoV-2 VNT of 4 human Covid-19 convalescent sera. Dots represent single  
 918 individuals; horizontal line represents mean per group. For statistical analysis of VNT data, one-  
 919 way ANOVA was performed in combination with Tukey's Multi comparison test to compare all pair  
 920 means.

921

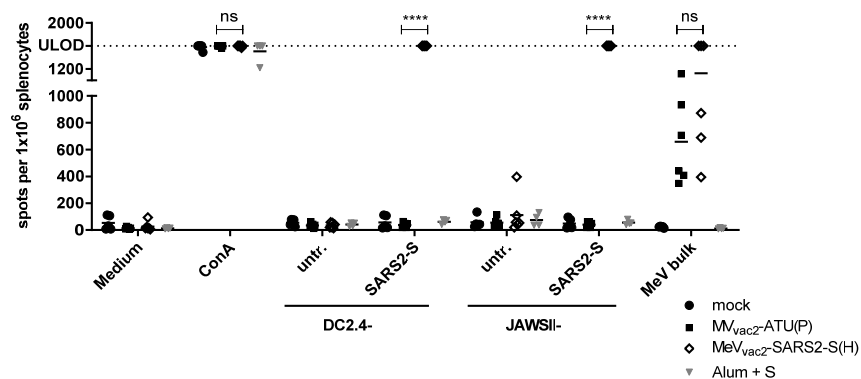

922

923 **Fig. 3: Secretion of IFN- $\gamma$  after antigen-specific re-stimulation of splenocytes.** IFN- $\gamma$  ELISpot  
 924 analysis using splenocytes of mice vaccinated on days 0 and 28 with indicated vaccines, isolated  
 925 21 days after boost immunization, and after co-culture with DC2.4 or JAWSII dendritic cell lines  
 926 transgenic for SARS-CoV-2 S (SARS2-S) or untransduced controls (untr.). To analyze cellular  
 927 responses directed against MeV, splenocytes were stimulated with 10  $\mu$ g/mL MeV bulk antigens or  
 928 were left unstimulated as controls (medium). The reactivity of splenocytes was confirmed by  
 929 Concanavalin A (ConA) treatment (10  $\mu$ g/mL). The number of cells per  $1 \times 10^6$  splenocytes represent  
 930 the amount of cells expressing IFN- $\gamma$  upon re-stimulation. Dots represent individual animals,  
 931 horizontal bars mean per group (n = 5 - 6). Samples above the upper detection limit (ULOD) were  
 932 displayed as such. For statistical analysis of grouped ELISpot data, two-way ANOVA analysis was  
 933 applied with paired Tukey's Multi comparison test used as post hoc test. ns, not significant (p > 0.05);  
 934 \*\*\*\*, p < 0.0001.

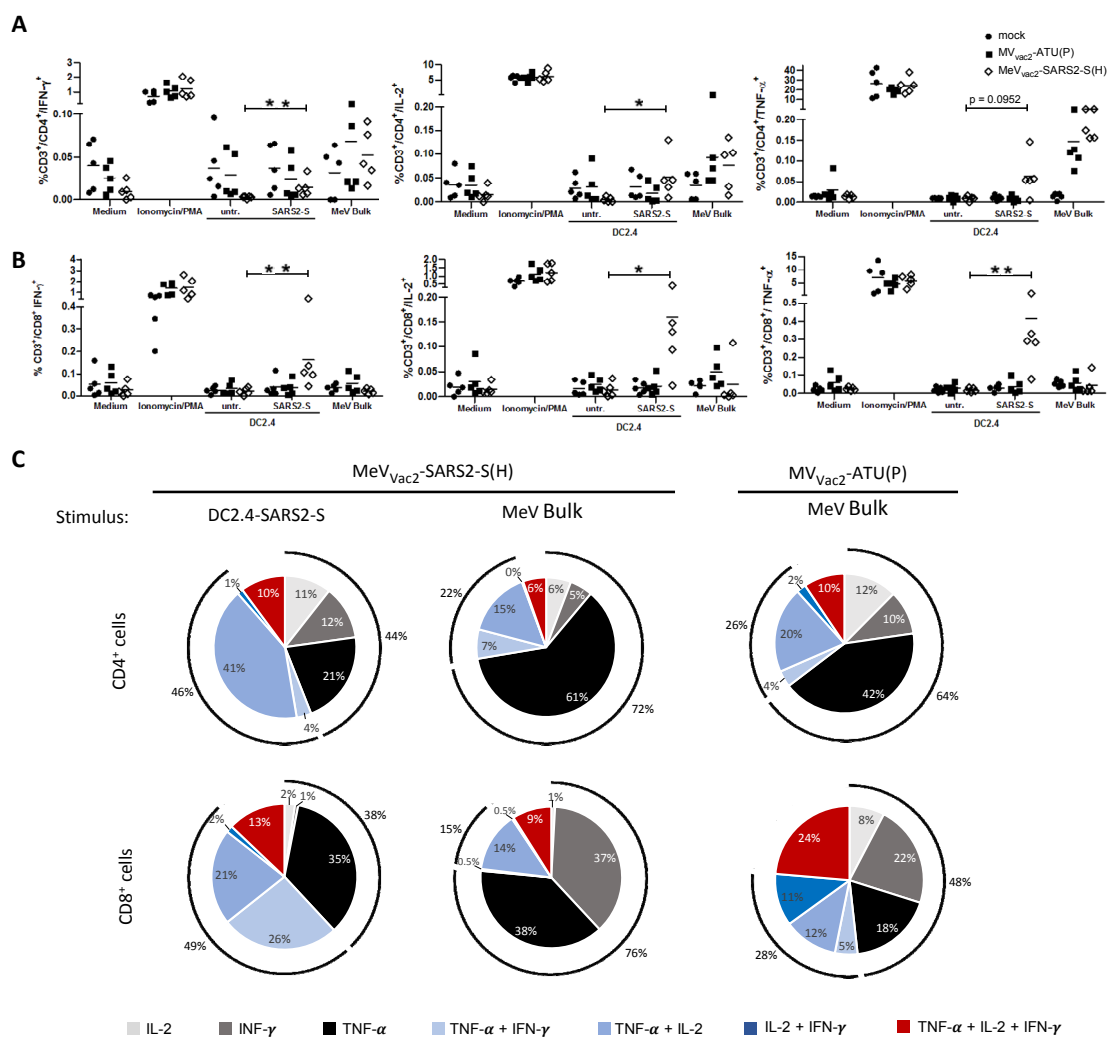

935  
 936 **Fig. 4: Detection of multi-functional T-cell responses induced by vaccination with MeV<sub>vac2</sub>-**  
 937 **SARS2-S(H).** Harvested splenocytes of MeV<sub>vac2</sub>-SARS2-S(H) vaccinated mice (same as depicted  
 938 in Fig. 3) were re-stimulated and subjected to intracellular staining (ICS) for IFN- $\gamma$ , TNF- $\alpha$ , and IL-  
 939 2, and stained for extracellular T-cell markers CD3, CD4, and CD8 for flow cytometry analysis.  
 940 Quantification of flow cytometry data of (A) CD4<sup>+</sup> and (D) CD8<sup>+</sup>- positive T cells after co-culture  
 941 with antigen-presenting DC2.4-SARS2-S or parental DC2.4 control cells, or after incubation with  
 942 indicated stimuli (MeV bulk antigen (MeV bulk), or untreated cells (mock); reactivity of splenocytes  
 943 was confirmed by ionomycin and phorbol myristate acetate (PMA) treatment (10  $\mu$ g/mL). Dots  
 944 represent individual animals, horizontal bars mean. Mann-Whitney test was used to compare  
 945 cytokines levels between DC2.4 and DC2.4-SARS2-S re-stimulated splenocytes in the MeV<sub>vac2</sub>-  
 946 SARS2-S(H) vaccine group without correction for multiple testing because of the exploratory  
 947 character of the study. \*, p<0.05; \*\*, p<0.01. (C) reveals poly-functional T cells depicted in the pie-  
 948 chart as fractions of cell populations expressing one, two, or all three of the tested cytokines and  
 949 indicating the size of each fraction among all responsive T cells.  
 950

951

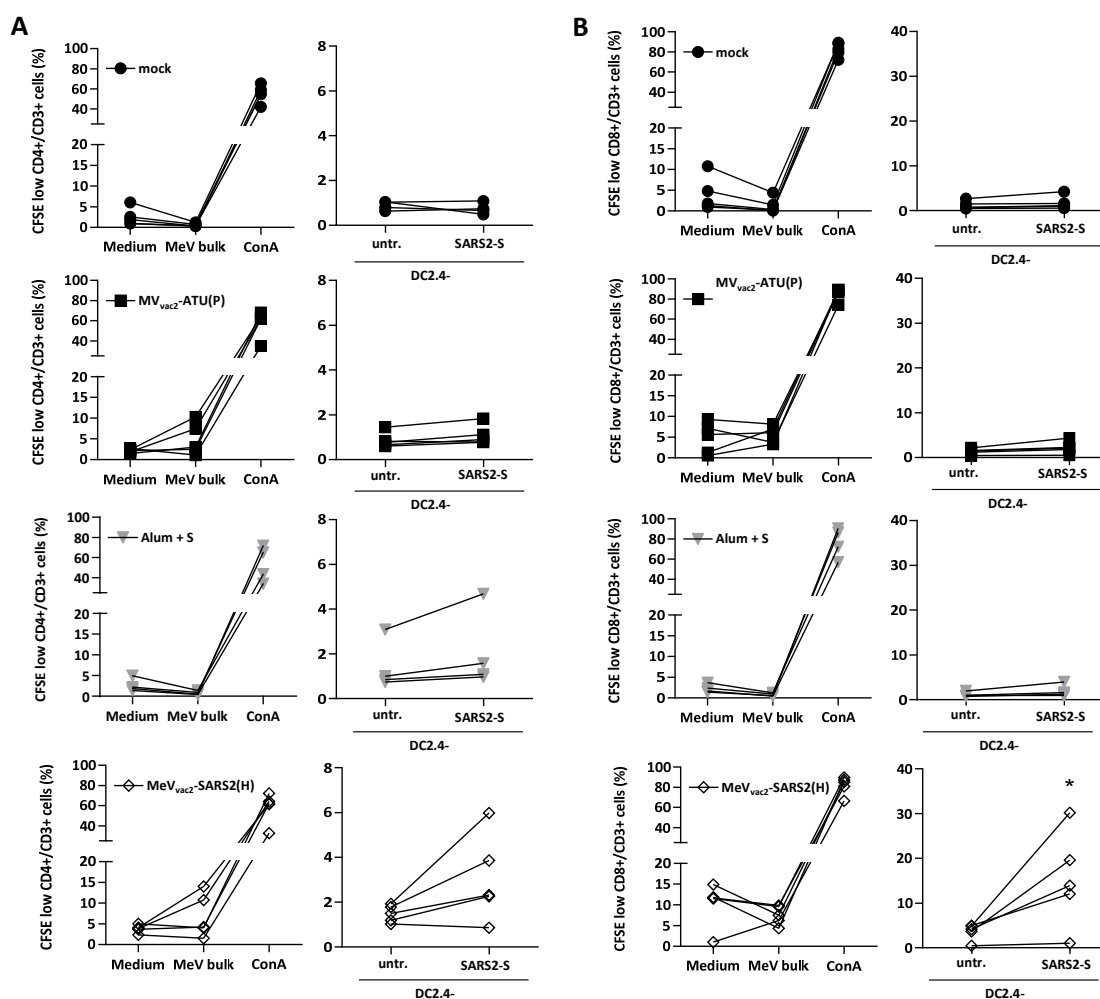

952

953 **Fig. 5: Ag-specific proliferation of SARS-CoV-2 S-specific T cells.** Proliferation assay using  
 954 splenocytes of mice vaccinated on days 0 and 28 with indicated viruses, isolated 21 days after  
 955 boost immunization, after co-culture with DC2.4 dendritic cell line transgenic for SARS-CoV-2 S  
 956 (SARS2-S) or untransduced parental DC2.4 (untr.). Depicted are the percentages of (A) CD4<sup>+</sup> or  
 957 (B) CD8<sup>+</sup> T cells with low CFSE staining, indicating proliferation in the samples. To analyze cellular  
 958  $\alpha$ -MeV responses, splenocytes were stimulated with 10  $\mu$ g/ml MeV bulk antigens or were left  
 959 unstimulated (medium). The reactivity of splenocytes was confirmed by concanavalin A (ConA)  
 960 treatment (10  $\mu$ g/ml). Results for splenocytes of vaccinated mice are displayed individually and the  
 961 trend between paired unstimulated and re-stimulated samples is outlined (n = 2-4). One-tailed  
 962 Mann-Whitney t-test. \*, p<0.05.

32



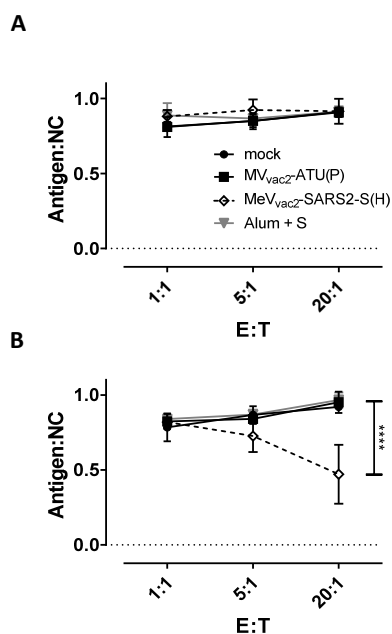

963

964

**Fig. 6: Antigen-specific killing activity of SARS-CoV-2 S-specific T cells.** Killing assay using  
965 splenocytes of mice vaccinated on days 0 and 28 isolated 21 days after the second immunization.  
966 Splenocytes were co-cultured with DC2.4 (A) or with antigen-presenting DC2.4-SARS2-S (B)  
967 or for 6 days. Activated CTLs were then co-cultured with EL-4<sub>green</sub>-SARS2-S target cells (Antigen)  
968 and EL-4<sub>red</sub> control cells (NC) at indicated E:T ratios for 4 h. Ratio of living target to non-target cells  
969 (Antigen:NC) was determined by flow cytometry. Depicted are means and standard deviation  
970 of each group (open diamonds, MeV<sub>vac2</sub>-SARS2-S(H); filled circles, mock; filled squares, MV<sub>vac2</sub>-  
971 ATU(P); grey triangles: S protein + Alum) (n = 3 - 5). For statistical analysis of grouped ELISpot  
972 data, two-way ANOVA analysis was applied with paired Tukey's Multi comparison test used as post  
973 hoc test. \*\*\*\*, p<0.0001.

974

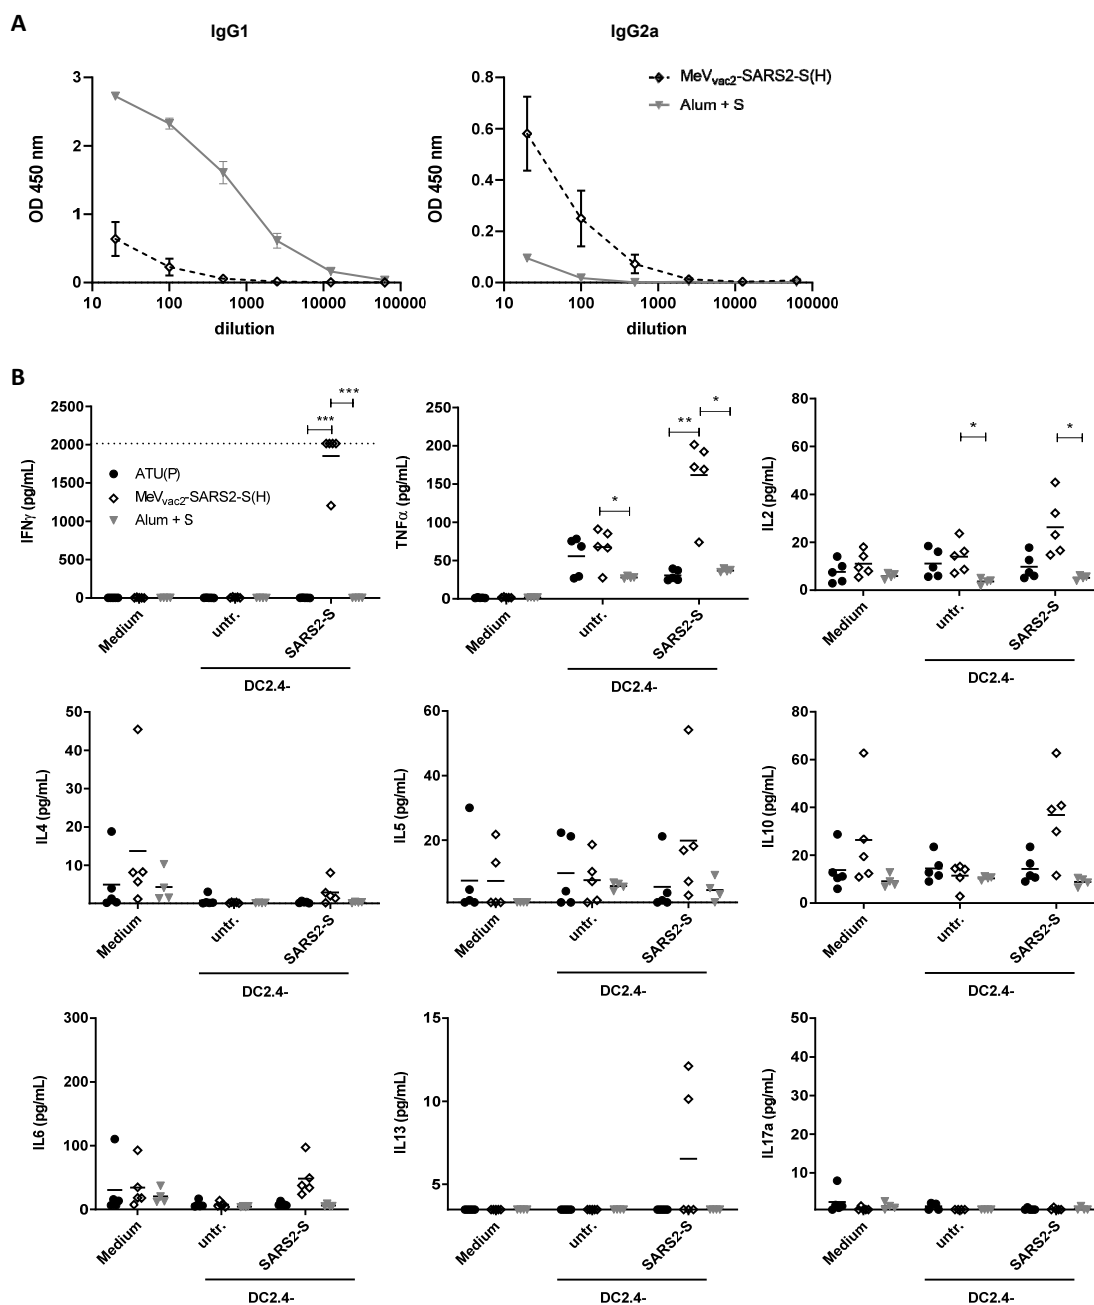

975  
 976 **Figure 7: Immune bias of induced responses.** To analyze skewing of immune responses  
 977 towards Th1- or Th2-biased immunity (A) sera and (B) splenocytes of vaccinated mice depicted  
 978 before were analyzed. (A) Sera of mice vaccinated on days 0 and 28 with MeV<sub>vac2</sub>-SARS2-S(H) or  
 979 Alum-adjuvanted S protein already shown in Fig. 2 were analysed for IgG1- or IgG2a-type  
 980 antibodies specific for SARS-CoV-2 S. IgG1 (left panel) or IgG2a (right panel) binding to  
 981 recombinant SARS-CoV S were determined by ELISA via the specific OD 450 nm value. Depicted  
 982 are means and respective standard deviation of the mean (SEM) of each group (n = 5 - 6). (B)  
 983 Splenocytes of the same mice already shown in Figs. 3 to 6 were analysed by multiplex cytokine  
 984 analysis for secretion of typical marker cytokines in the supernatant after re-stimulation by co-

985 culture with antigen-presenting DC2.4-SARS2-S cells. DC2.4 cells served as non-specific control  
986 stimulus. Dots represent individual animals, horizontal bars mean per group (n = 4 - 5). IFN- $\gamma$ : upper  
987 limit of detection (ULOD): 2015.2 pg/mL; IL-6: ULOD: 3992,4 pg/mL; IL-17a lower limit of detection  
988 (LLOD): 0.473 pg/mL; IL-4 LLOD: 0.095 pg/mL; IL-5 LLOD: 0.685 pg/mL; IL-13 LLOD: 3.463 pg/mL.  
989 For statistical analysis of grouped multiplex data, two-way ANOVA analysis was applied with paired  
990 Tukey's Multi comparison test as post hoc test. \*, p<0.05; \*\*, p<0.01; \*\*\*, p<0.00  
991

992 **Supplementary Figures**  
993

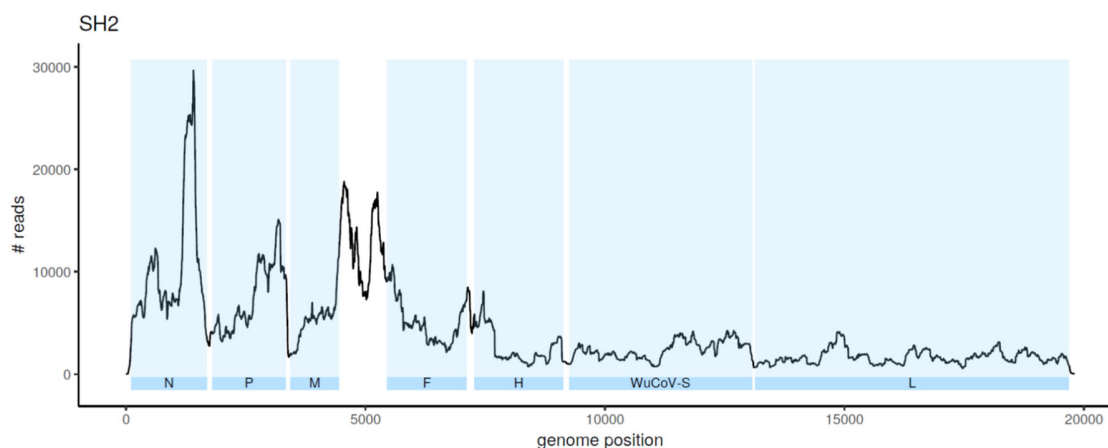

994  
995  
996  
997  
998  
999  
1000  
1001  
1002  
1003

**Suppl. Fig. S1: Coverage of of vaccine candidate MeV<sub>vac2</sub>-SARS2-S(H) genome during next generation sequencing.** Schematic depiction of read frequency at each position of the vaccine virus genome. Blue areas indicate respective viral coding sequences, white areas indicate intergenic regions and untranscribed terminal regions (UTRs) of the genome. Coverage across the genome was sufficient for variant detection and reflects the transcription gradient typically observed in measles virus total RNAseq data. Since the majority of reads are mRNA-derived, low read numbers decrease strongly between the coding regions and continually towards the 5' end.

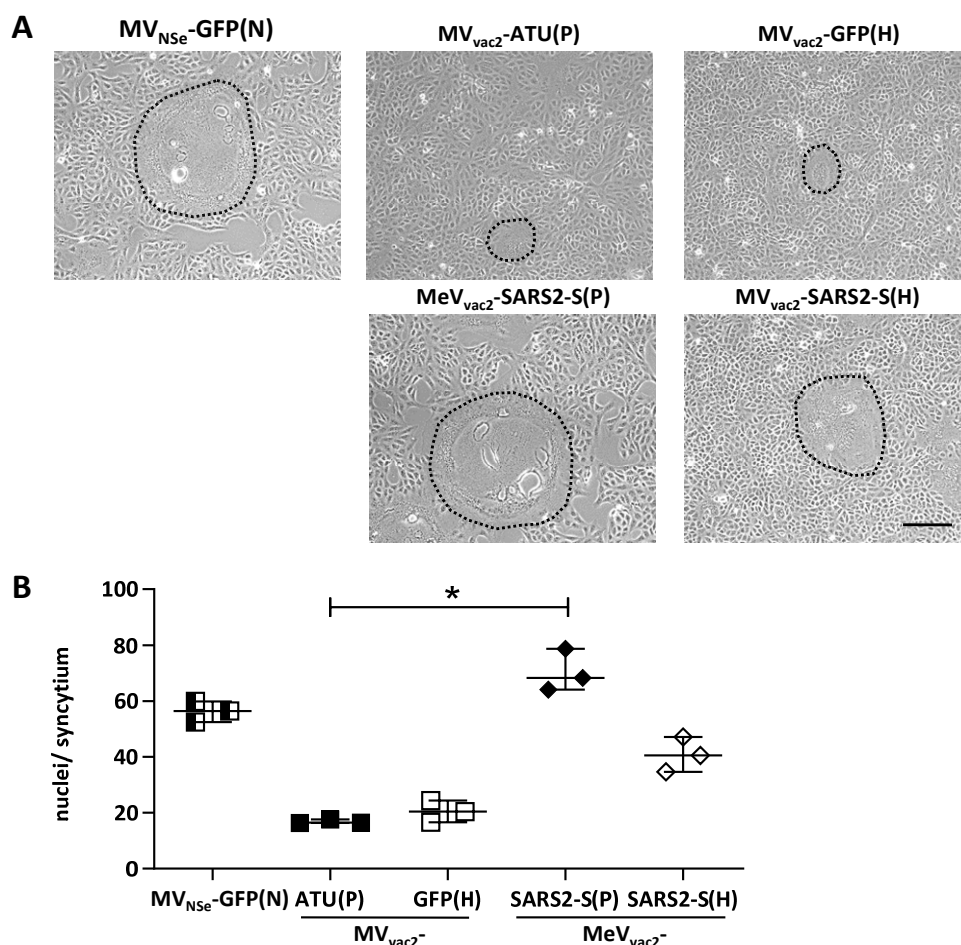

1004  
1005  
1006  
1007  
1008  
1009  
1010  
1011  
1012  
1013  
1014

**Suppl. Fig. S2: Characterization of fusogenic phenotype of MeV<sub>vac2</sub>-SARS2-S(P) and MeV<sub>vac2</sub>-SARS2-S(H).** (A) Photographs of fusion activity of Vero cells infected at an MOI of 0.01 with MeV<sub>vac2</sub>-SARS2-S(P) or MeV<sub>vac2</sub>-SARS2-S(H) encoding SARS-CoV-2 S in additional transcription units post P or post H, respectively, in direct comparison to MV<sub>vac2</sub>-ATU(P) or MV<sub>vac2</sub>-GFP(H) control vaccine viruses or MV<sub>NSe</sub>-GFP(N) hyperfusogenic oncolytic MeV. Representative picture of one out of three independent experiments. Scale bar represents 200 μm. (B) Cell fusion was quantified 30 h after infection. For statistical analysis, one-way ANOVA was performed in combination with Tukey's Multi comparison test to compare all pair means. \*, p<0.05.

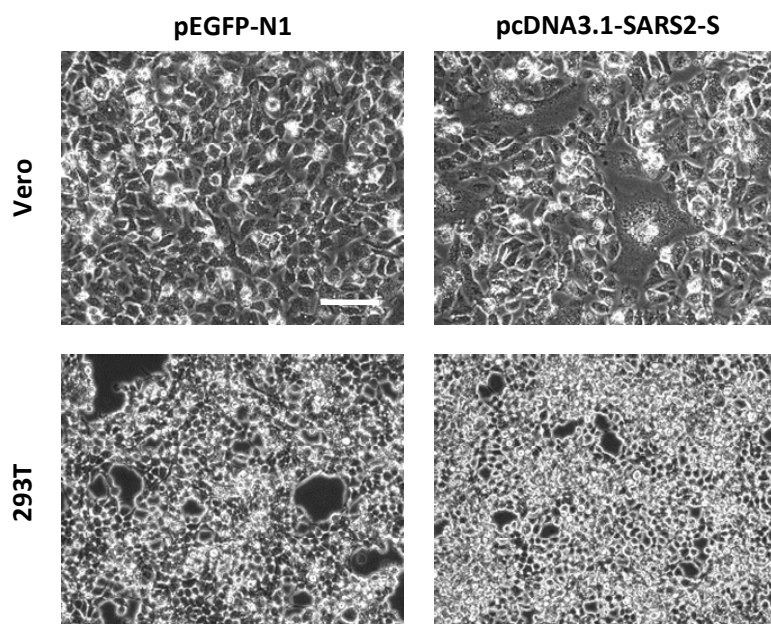

1015  
1016  
1017  
1018  
1019  
1020  
1021

**Suppl. Fig. S3: Expression of SARS-CoV-2 S protein in Vero and 293T cells.** Photographic depiction of fusion activity in Vero or 293T cells 48 h after transfection with 1  $\mu$ g of SARS-CoV-2 S expression plasmid of control DNA. One representative out of three independent experiments is shown. Scale bar represents 100  $\mu$ m.

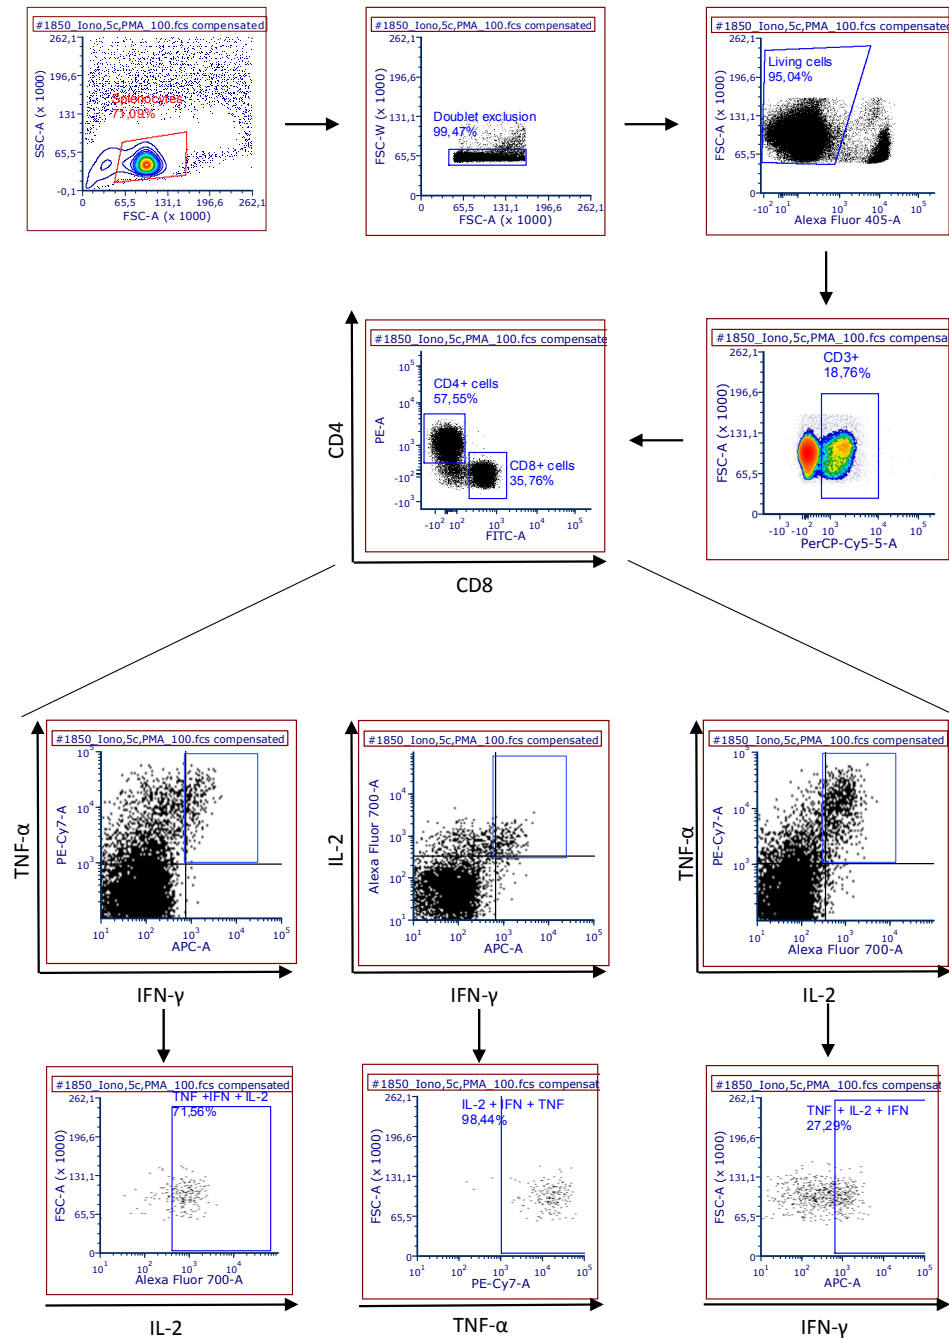

1022  
1023  
1024  
1025  
1026  
1027  
1028  
1029

**Suppl. Fig. S4:** Gating strategy for intracellular cytokine staining. Exemplary depiction of the gating strategy to analyze T cells after re-stimulation and staining for cytokine induction. The gating strategy includes cell doublet exclusion, selection for living cells and separation of CD8+ and CD4+ T cells within CD3+ splenocyte populations. Respectively gated T cell populations were then analysed for expression of IFN-g, TNF-a, or IL-2. Multi-colour flow cytometry allows assessment of double- or triple-positive cells, exemplarily shown for CD4+ T cells after stimulation with ionomycin and PMA.
